# Supplementary material
Source: PubMed Central journal article supplement (PMC3538209)
Supplement: 1216516110_sapp.pdf [file 1216516110_sapp.pdf]

## SI APPENDIX

### Carboxylic acid reductase is a versatile enzyme for the conversion of fatty acids into fuels and chemical commodities.

**M. Kalim Akhtar<sup>a,b</sup>, Nicholas J. Turner<sup>b,1</sup>, and Patrik R. Jones<sup>a,1</sup>**

<sup>a</sup> Department of Biochemistry and Food Chemistry, University of Turku, Tykistökatu 6A, 6krs, 20520 Turku, Finland

<sup>b</sup> School of Chemistry, Manchester Institute of Biotechnology, University of Manchester, 131 Princess Street, Manchester, M1 7DN

<sup>1</sup> To whom correspondence should be addressed: Patrik R. Jones, [patjon@utu.fi](mailto:patjon@utu.fi) & Nicholas J. Turner, [nicholas.turner@manchester.ac.uk](mailto:nicholas.turner@manchester.ac.uk)

## Methods

### Strains and plasmids

The genes encoding for *M. marinum* CAR and *B. Subtilis* Sfp were synthesized with codon-optimization for *E. coli* (Genscript, USA), while *tesA*, *slr1192* and *ahr* were amplified from *E. coli* BL21(DE3) and *Synechocystis* sp. PCC 6803 genomes using the following PCR program: 95 °C for 2 min; 40 cycles of 95 °C for 30 s, 56 °C for 30 s and 72 °C for 1 min; and 72 °C for 20 min. Genetic inserts along with T7-based commercial vectors (Novagen) were cut with the appropriate restriction enzymes (New England Biolabs) and ligated using T4 DNA ligase (Fermentas) (Tables S3-S5). Multiple genes were assembled in artificial operons as described previously (1). Plasmids were used to transform *E. coli* BL21 (DE3) to generate the strains listed in Table S6. Table S7 summarizes the gene-products used to engineer the recombinant pathways.

### Protein expression and purification

Overnight LB-grown pre-cultures of BL21(DE3) were used to inoculate 20 ml cultures of Overnight Express™ Instant TB Medium (Novagen) at 2% (v/v). Cultures were incubated overnight (18-24 h, 30 °C, 250 rpm). Cells were pelleted and resuspended in a lysis buffer containing lysozyme (2 mg/ml) and 2% (v/v) hexane, and incubated for 30 min at room temperature with gentle inversion. The insoluble debris was centrifuged (17,000g, 5 min) and the supernatant was applied to a microfuge spin column pre-filled with 200 µl His-Select® Nickel Affinity Gel (Sigma Aldrich). The column was washed five times with 0.5 ml 0.1 M Tris-HCl (pH 7.5, 21 °C) and the recombinant his-tagged protein eluted with 100 µl 0.4 M imidazole, prepared in 50 mM Tris-HCl buffer (pH 7.5, 21 °C). Protein recovery was estimated using the Bio-Rad Protein Assay (Biorad).

## Enzyme characterization

All enzyme reactions were performed in triplicates and monitored at 340 nm for up to 15 min in 96-well microplates (Tecan M200 Affinity). Control reactions without addition of the purified enzyme were also included to take into account any background oxidation of NADPH. For the CAR assay, a 100  $\mu$ l reaction volume typically contained the following components: CAR<sub>his</sub> (0-10  $\mu$ g/ml), 1 mM NADPH, 1 mM ATP, 10 mM MgCl<sub>2</sub> and 0.5 mM fatty acids. For K<sub>m</sub> and V<sub>max</sub> determinations, the various (co)substrates: fatty acids, NADPH and ATP were prepared at 11 different concentrations with the concentration range specified in the figure legends. Based on the initial reaction rates, the apparent K<sub>m</sub> and V<sub>max</sub> values were determined using the enzyme kinetics module of SigmaPlot (Systat Software, San Jose, CA). For the AHR assay, reactions typically contained the following components: YjgB<sub>his</sub> (1 or 10  $\mu$ g/ml), 1 mM NADPH and 0.5 mM C<sub>4</sub>-C<sub>12</sub> aldehydes or C<sub>4</sub>-C<sub>12</sub> alcohols. For qualitative confirmation of aldehyde (in the case of CAR<sub>his</sub>) and alcohol synthesis (in the case of YjgB<sub>his</sub>), reaction mixtures (500  $\mu$ l) were mixed with an organic solvent (75  $\mu$ l) and the organic phase analyzed by GC-MS, as described below.

## *In vivo* production of fatty alcohols and alkanes

Strains were cultivated either in Overnight Express™ Instant TB Medium (Novagen) or in a defined minimal medium containing: M9 salts (Sigma Aldrich); BME vitamins (Sigma Aldrich); 100 mM potassium phosphate buffer (pH 7.5, 21 °C); 2 mM MgSO<sub>4</sub>; 0.1 mM CaCl<sub>2</sub>; micronutrient mix consisting of 10 nM FeSO<sub>4</sub>, 3  $\mu$ M (NH<sub>4</sub>)<sub>6</sub>Mo<sub>7</sub>O<sub>24</sub>, 0.4 mM boric acid, 30  $\mu$ M CoCl<sub>2</sub>, 15  $\mu$ M CuSO<sub>4</sub>, 80  $\mu$ M MnCl<sub>2</sub> and 10  $\mu$ M ZnSO<sub>4</sub>; 2% (w/v) glucose; appropriate antibiotics, 50  $\mu$ g/ml ampicillin and/or 50  $\mu$ g/ml spectinomycin; and 50  $\mu$ M IPTG. Cultures (2-5ml) were incubated for up to 48 h with shaking at 180 - 200 rpm in 50 ml sterile Falcon tubes. For total fatty alcohol and alkane quantification, 100  $\mu$ l cell culture was vigorously mixed with 200  $\mu$ l acetone, microfuged (17,000g, 5 min) and the resulting supernatant analyzed by GC-MS as described below. Glucose levels were quantified at 340nm, based on the reduction of NAD<sup>+</sup> catalyzed by glucose-6-phosphate dehydrogenase.

## *In vitro* conversion of fatty acids to fatty alcohols and alkanes

*In vitro* alkane synthesis was carried out as described previously (2) with the addition of CAR<sub>his</sub> (100  $\mu$ g/ml), 1 mM NADPH, 1 mM ATP and 0.5 mM fatty acid (C<sub>4</sub>-C<sub>16</sub>); C<sub>14</sub>-C<sub>16</sub> fatty acid substrates were added as suspensions due to poor solubility. For *in vitro* fatty alcohol formation, ADC<sub>his</sub> was replaced with Ahr<sub>his</sub> (10  $\mu$ g/ml) and NADH, N-phenylmethazonium methosulphate (PMS) & ferrous ammonium sulphate were omitted. All tubes were incubated in a heat block at 30 °C for up to 4 h without shaking. For analyte extraction, reaction mixtures were terminated either by the addition of acetone or chloroform. The organic phase/supernatant was analyzed by GC-MS as described below.

## *In vitro* conversion of fatty acids to fatty alcohols and alkanes

For *in vitro* alkane synthesis, reactions were performed in 500  $\mu$ l reaction volumes: 50 mM, Tris-HCl (pH 7.5, 21°C), CAR<sub>his</sub> (100  $\mu$ g/ml), ADC<sub>his</sub> (200  $\mu$ g/ml), 1 mM NADPH, 1 mM ATP, 10 mM MgCl<sub>2</sub>, 20  $\mu$ M PMS, 1 mM NADH, 20  $\mu$ M ferrous ammonium sulphate and 0.5 mM fatty acid substrates ranging from C<sub>4</sub> (butyric acid) to C<sub>16</sub> (hexadecanoic acid). The protocol was modified according to ADC assays described previously (2). For *in vitro* fatty alcohol formation, ADC<sub>his</sub> was replaced with YjgB<sub>his</sub> (10  $\mu$ g/ml) and the following components were omitted: NADH, PMS & ferrous ammonium sulphate. Due to their

hydrophobicity, the C<sub>14</sub> and C<sub>16</sub> fatty acid substrates were added to the assays as suspensions. All reactions were performed in a heat block at 30 °C for up to 4 h without shaking, and terminated either by addition of acetone or chloroform. The supernatant or organic phase was analyzed by GC-MS as described below. Given that conversion was dependent on two NAPH-requiring reactions, fatty alcohol formation was also monitored by following the oxidation of NADPH at 340 nm.

### ***In vitro* conversion of TAGs to aldehydes**

Reactions were performed in a 1 ml volume containing the following: 50mM Tris-HCl (pH 7.5, 21°C), CAR<sub>his</sub> (300 µg/ml), lipase (100 µg/ml), 1 mM NADPH, 1 mM ATP, 10 mM MgCl<sub>2</sub> and 1 mM suspensions or emulsions of the commercially purified TAGs: C<sub>8</sub> TAG (glyceryl trioctanoate) and C<sub>12</sub> TAG (glyceryl tridodecanoate). All tubes were incubated in a heat block at 30 °C for up to 4 h. Reactions were terminated by vigorously mixing with an equal of chloroform. The lower organic phase was analyzed directly by size-exclusion HPLC as described below. For reactions containing C<sub>12</sub> TAG, samples were concentrated by evaporation of solvent in a Genevac (30 °C, 10 min) prior to HPLC analysis.

### **Lipase-mediated *in vivo* formation of fatty alcohols**

A 1 ml preinduced cell culture (OD ~10) of the strain, PC-Ahr<sub>his</sub>, encoding for the CAR<sub>his</sub> and Ahr<sub>his</sub> enzymes was centrifuged (7000g, 10 min). The cell pellet was resuspended in an equal volume of 100 mM potassium phosphate buffer (pH 7.5, 21°C) together with three distinct sources of TAGs: (i) harvested cells of the cell wall-less *Chlamydomonas reinhardtii* strain cc406, (ii) palm oil (Afroase) and (iii) coconut oil (Biona Organic). Cells were supplemented with 100mM glucose and incubated at 30 °C with 100 µl samples taken at 30 min, 1 h, 2 h and 5 h. Fatty alcohols were analyzed by GC-MS as described below.

### **Hydrocarbon analysis by GC-MS**

Metabolite analysis was performed with an Agilent 7890A gas chromatograph equipped with a 5975 mass spectrometry detector. All samples (1 µl) were analyzed in splitless injection mode with the inlet temperature set at 300 °C and passed through an Equity-1 fused silica capillary column (Supelco) (30 m x 320 µm x 1 µm) at a flow rate of 1.9 ml/min, using helium as the carrier gas. The oven was initially held at 45 °C for 2.5 min and ramped up to 300 °C at a rate of 20 °C/min. Data was acquired within the 25–350 m/z range. For analyte identification, fragmentation patterns and retention times of the analytes were compared with the NIST mass spectral library and commercially available standards of fatty alcohols, acids and alkanes. A standard curve for quantification was prepared with commercial preparations of fatty alcohols and alkanes.

### **Hydrocarbon analysis by HPLC-size exclusion chromatography**

For separation and detection of the TAGs, fatty acids and aldehydes, size-exclusion HPLC analysis was carried out using an Agilent 1200 Series HPLC module coupled to an Agilent refractive index detector. For analyte separation, samples (10 µl) were injected and passed through 3 size-exclusion columns (300 x 7.8 mm x 5 or 10 µm; Phenomenex) of different pore sizes; 50, 100 and 500 Å; and connected in series, at a flow rate 0.8 ml/min. The chromatography was performed in isocratic mode using super-purity grade chloroform (Romil) as the mobile phase with column and refraction index detector temperatures set at 40 °C. The retention times of the analytes were confirmed using commercial standards.

## Stoichiometric evaluation

The stoichiometric conversion efficiency (percent conversion, mole product per mole glucose) was calculated by two independent methods, as described in detail below:

A maximum potential yield of C<sub>12</sub> fatty alcohol per glucose is 0.33 and 0.288, respectively, without biomass formation. All stoichiometric evaluations were made in minimal media. Where an error is given in the text it represents the standard error (SEM, n=2-4).

The experimentally measured distribution of fatty alcohols in all TPC-Ahr strains was highly similar regardless of cultivation conditions, as summarized below:

|                |            | C12:1ol | C12ol | C14:1ol | C14ol | C16:1ol | C16ol | C18:1ol | C18ol |
|----------------|------------|---------|-------|---------|-------|---------|-------|---------|-------|
| Complex media  | TPC-Ahrhis | 8       | 38    | 13      | 22    | 14      | 1     | 2       | 0     |
|                | TPC-Ahrhis | 9       | 37    | 13      | 22    | 14      | 2     | 3       | 0     |
| Minimal media  | TPC2       | 8       | 41    | 8       | 26    | 12      | 3     | 2       | 0     |
|                | TPC2       | 8       | 40    | 9       | 26    | 12      | 3     | 2       | 0     |
|                | TPC-Ahr    | 8       | 47    | 7       | 24    | 10      | 2     | 1       | 0     |
|                | TPC-Ahr    | 8       | 47    | 7       | 23    | 10      | 3     | 1       | 0     |
|                | TPC-Ahrhis | 10      | 49    | 8       | 21    | 10      | 2     | 1       | 0     |
|                | TPC-Ahrhis | 10      | 48    | 8       | 21    | 10      | 2     | 1       | 0     |
|                | TPC-Ahrhis | 10      | 36    | 11      | 25    | 12      | 2     | 1       | 2     |
|                | TPC-Ahrhis | 8       | 30    | 11      | 27    | 17      | 3     | 1       | 3     |
|                | Average    |         | 8.7   | 41.3    | 9.4   | 23.9    | 12.2  | 2.2     | 1.7   |
| Standard error |            | 0.3     | 2.1   | 0.8     | 0.7   | 0.8     | 0.2   | 0.2     | 0.4   |

The molar demand for glucose that is required for each of the main fatty alcohols, identified in the TPC-Ahr strain, was estimated based on the assumption that approximately 3 mole of CO<sub>2</sub> is released per mole of catabolized glucose through substrate oxidation. The molar demand for glucose was related to the distribution of fatty alcohols that was repeatedly observed; this is summarized in the Table below:

|         | A                           | B                                          | C                                                              | D                                                               |
|---------|-----------------------------|--------------------------------------------|----------------------------------------------------------------|-----------------------------------------------------------------|
|         | Average<br>distribution (%) | Stoichiometric<br>glucose<br>required (mM) | Carbon distribution<br>fatty alcohol<br>per 100 mM glucose (%) | Stoichiometric yield<br>fatty alcohol<br>per 100 mM glucose (%) |
| C12:1ol | 8.7                         | 26.1                                       | 7.8                                                            | 2.6                                                             |
| C12ol   | 41.3                        | 124                                        | 37.1                                                           | 12.4                                                            |
| C14:1ol | 9.4                         | 33                                         | 9.9                                                            | 2.8                                                             |
| C14ol   | 23.9                        | 83.5                                       | 25                                                             | 7.1                                                             |
| C16:1ol | 12.2                        | 48.8                                       | 14.6                                                           | 3.7                                                             |
| C16ol   | 2.2                         | 8.9                                        | 2.7                                                            | 0.7                                                             |
| C18:1ol | 1.7                         | 7.5                                        | 2.3                                                            | 0.5                                                             |
| C18ol   | 0.5                         | 2.4                                        | 0.7                                                            | 0.2                                                             |
| Biomass | --                          | --                                         | 0                                                              | --                                                              |
| Sum     | 100                         | 335.5                                      | 100                                                            | 29.9                                                            |

The analysis suggests that the maximum potential molar yield of fatty alcohols with the TPC-Ahr strains is 30% (mole of fatty alcohols per mole of glucose), however, under these conditions there would be no biomass formation. Since fatty alcohol production was studied under exponential batch growth conditions, the same analysis was also repeated with the assumption that 25% of all glucose is used for biomass-formation. The maximum yield of fatty alcohols is then 22.4%.

An alternative approach to estimate the maximum potential yield of fatty alcohols is to carry out the so-called 'flux balance analysis'. The maximum potential molar yield was calculated for C<sub>12</sub> alcohol with a stoichiometric model of *iJR904 E. coli* to which the TPC pathway was added. Within the *E. coli iJR904* stoichiometric model (3), the following three reactions were added:

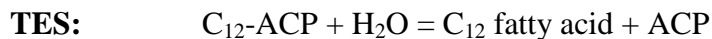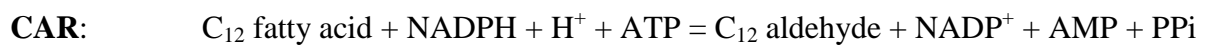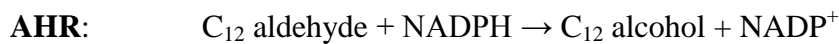

The *iJR904* (3) and *iAF1260* (4) models do not include any pathways for C<sub>14</sub>-ACP and C<sub>16</sub>-ACP formation. The calculation of the potential conversion rate for all fatty alcohols is therefore estimated according to C<sub>12</sub> fatty alcohol synthesis even though the C<sub>14</sub> and C<sub>16</sub> alcohols are produced with and without mono-unsaturation.

After loading the *iJR904\_GlcMM* model into COBRA Toolbox 1.3.3 (5), the three reactions are added accordingly:

```
modelTes = addReaction(model,'TesA',{'ddcaACP[c]','h2o[c]','dodecanoate[c]','ACP[c]'},[-1
-1 1 1], false);
```

```
modelCAR =
addReaction(modelTes,'CAR',{'dodecanoate[c]','nadph[c]','h[c]','atp[c]','dodecanal[c]','nadh[c]','amp[c]','ppi[c]'},[-1 -1 -1 -1 1 1 1 1], false);
```

```
modelAHR =
addReaction(modelCAR,'AHR',{'dodecanal[c]','nadph[c]','dodecanol[c]','nadh[c]'},[-1 -1 1 1],
false);
```

Then, an exchange reaction is also added for C<sub>12</sub> alcohol:

```
modelTPC = addReaction(modelAHR,'dodecanolEX',{'dodecanol[c]'},[-1], true);
```

In order to obtain the maximum potential conversion rate, we changed the objective function from biomass to 'dodecanolEX', which represents the rate of accumulation of C<sub>12</sub> fatty alcohol given that C<sub>12</sub> fatty alcohol does not excrete from wild-type *E. coli* cultivated in minimal media, and optimize, as follows:

```
modelTPCObjC12 = changeObjective(modelTPC, 'dodecanolEX');
solution = optimizeCbModel(modelTPCObjC12,'max',false,false)
```

A solution of  $f$ : 1.7266 was obtained using glpk solver.

Since the maximum glucose uptake rate is 6 mmol per gram dry weight per h, the maximum potential molar conversion efficiency is:

$1.7266/6 = 0.288$  mol  $C_{12}$  fatty alcohol per mole glucose. Under such conditions, there would be no biomass formation as the robustness analysis shows above.

If the above analysis is carried out also for the cyanobacterial pathway,

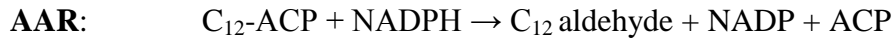

with the following reactions added to COBRA:

```
modelSchirmer =  
addReaction(model,'ACR',{'ddcaACP[c]','nadph[c]','dodecanal[c]','ACP[c]','nadp[c]'},[-1 -1 1  
1 1], false);
```

```
modelAHR2 =  
addReaction(modelSchirmer,'AHR',{'dodecanal[c]','nadph[c]','dodecanol[c]','nadp[c]'},[-1 -1  
1 1], false);
```

```
modelTPC2 = addReaction(modelAHR2,'dodecanolEX',{'dodecanol[c]'},[-1], true);
```

```
robustnessAnalysis(modelTPC2, 'dodecanolEX');
```

we obtain an  $f$ -value of 1.7600, 1.9% greater potential yield than the CAR pathway, without any biomass formation.

In order to provide insight into the relative distribution of fluxes in the optimized models, the fluxes for key enzymes in central carbon metabolism and the major excretion products were extracted from the optimized solution. The values are plotted on the next page, with enzyme names as given for the *iJR904 E. coli* genome-scale model (3). The main difference between the two pathways is the additional ATP requirement of the CAR-dependent pathway. Notably, the simulation is unrealistic as there is no biomass-formation. Still, the below bar graph suggests that the task of reducing  $\text{NADP}^+$  is shifted slightly away from the proton gradient dependent transhydrogenase PntAB (THD2) towards the pentose phosphate pathway (as shown by the ratio of flux through PGI (phosphoglucoseisomerase) vs. G6PDH2r (glucose-6-phosphate dehydrogenase, Zwf)). As enhanced flux through the oxidative pentose phosphate pathway results in increased loss of carbon, in the form of  $\text{CO}_2$ , there is less fatty alcohol produced.

All estimates of Gibbs free energy changes under standard conditions were obtained using the eQuilibrator online platform (6).

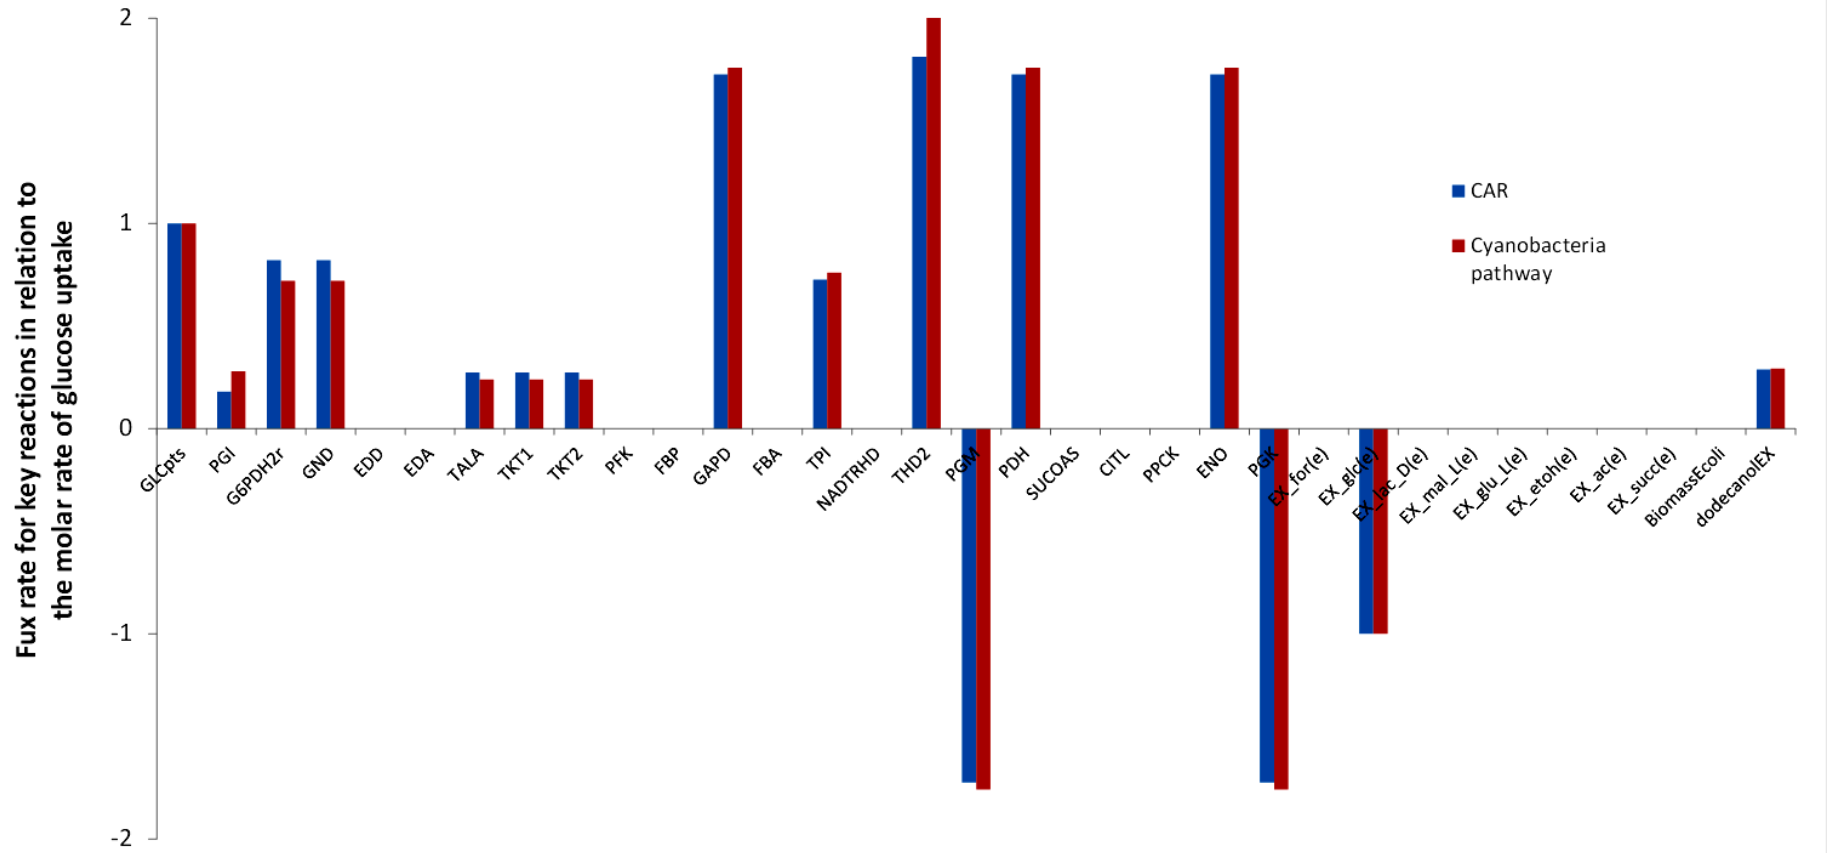

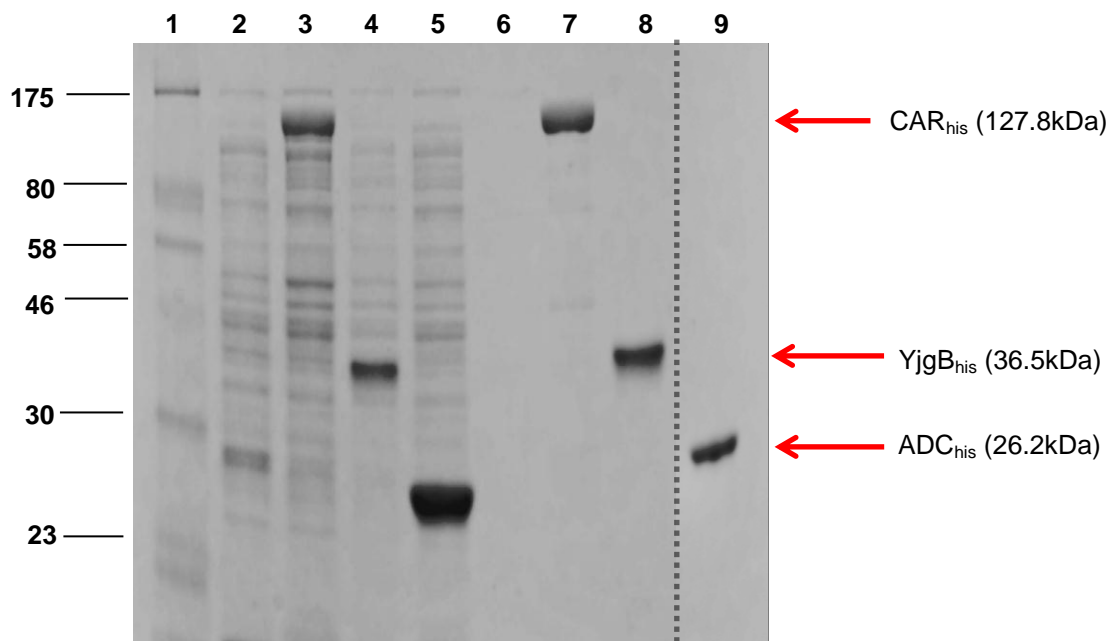

**Fig. S1** SDS-PAGE of purified preparations of CAR<sub>his</sub>, Ahr<sub>his</sub> and ADC<sub>his</sub>. Proteins were separated on 12% (w/v) acrylamide gel and stained with Coomassie Blue (7). Lane 1, molecular-mass markers (in kDa); lane 2, crude fraction of BL21(DE3); lane 3, crude fraction of PC; lane 4, crude fraction of Ahr<sub>his</sub>; lane 5, crude fraction of ADC<sub>his</sub>; lane 6, his-tag eluate fraction from BL21(DE3); lane 7, purified CAR<sub>his</sub>; lane 8, purified crude Ahr<sub>his</sub>; and lane 9, purified ADC<sub>his</sub>. Purified recombinant proteins are marked with an arrow and their theoretical molecular weights indicated in brackets.



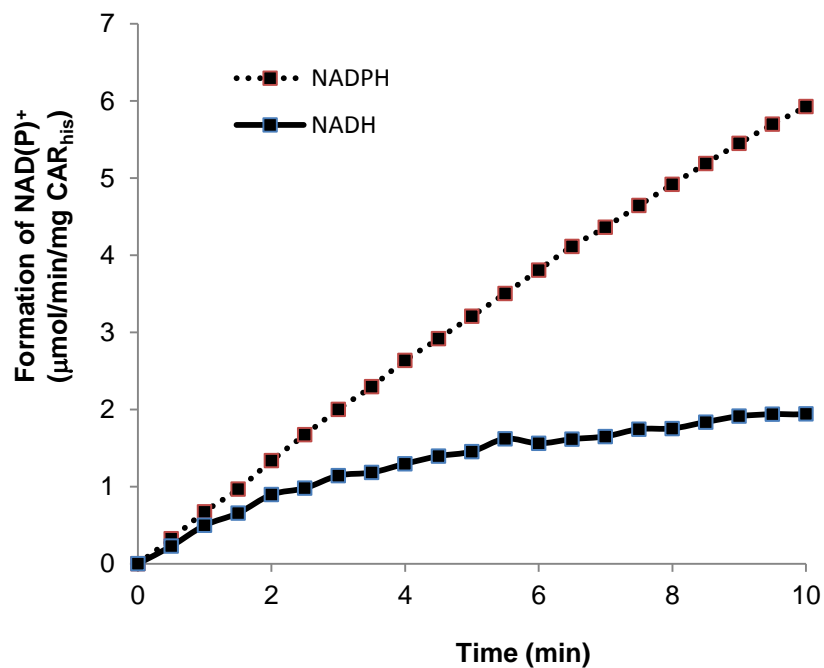

**Fig. S2** NADPH specificity of CAR<sub>his</sub>. Reactions were carried out in 50 mM Tris-HCl (pH 7.5, 21°C) containing purified CAR<sub>his</sub> (0.25 μg/ml), 2 mM benzoic acid, 10 mM MgCl<sub>2</sub> and 1mM ATP with either 1 mM NADPH or 1 mM NADH as the source of reductant. Absorbance was monitored at 340 nm at 30 s intervals over a 10 min period.

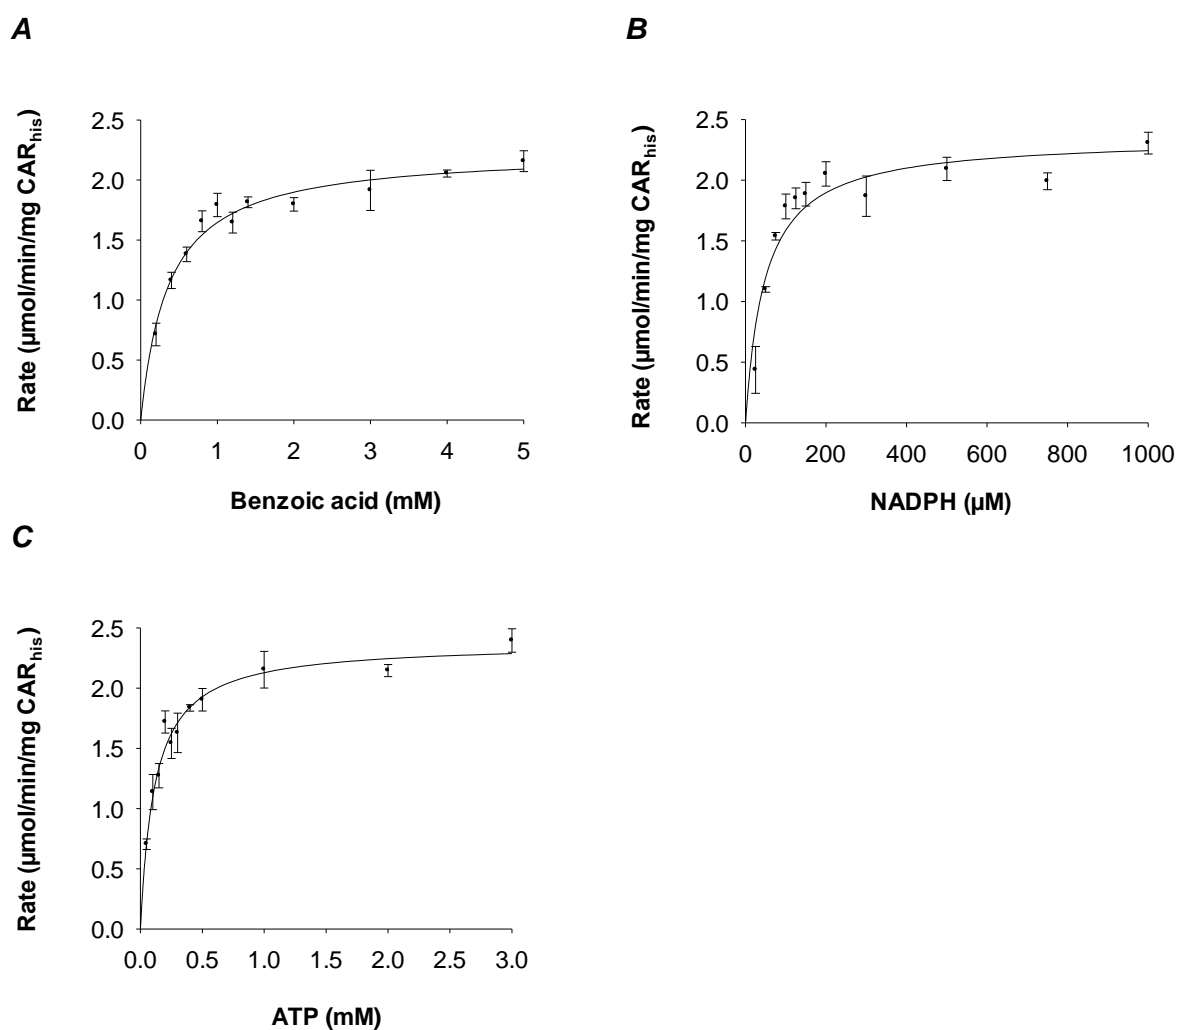

**Fig. S3** Kinetic analysis of  $\text{CAR}_{\text{his}}$  in the presence of benzoic acid. Reactions were carried out in the presence of varying concentrations of (A) benzoic acid (0.2-0.5 mM), (B) NADPH (250-1000  $\mu\text{M}$ ) and (C) ATP (0.05-3 mM). The  $K_m$  and  $V_{\text{max}}$  were determined from non-linear regression plots, using the enzyme kinetics module of Sigmaplot (Systat Software, San Jose, CA). Results are means  $\pm$  SEM of triplicate experiments.

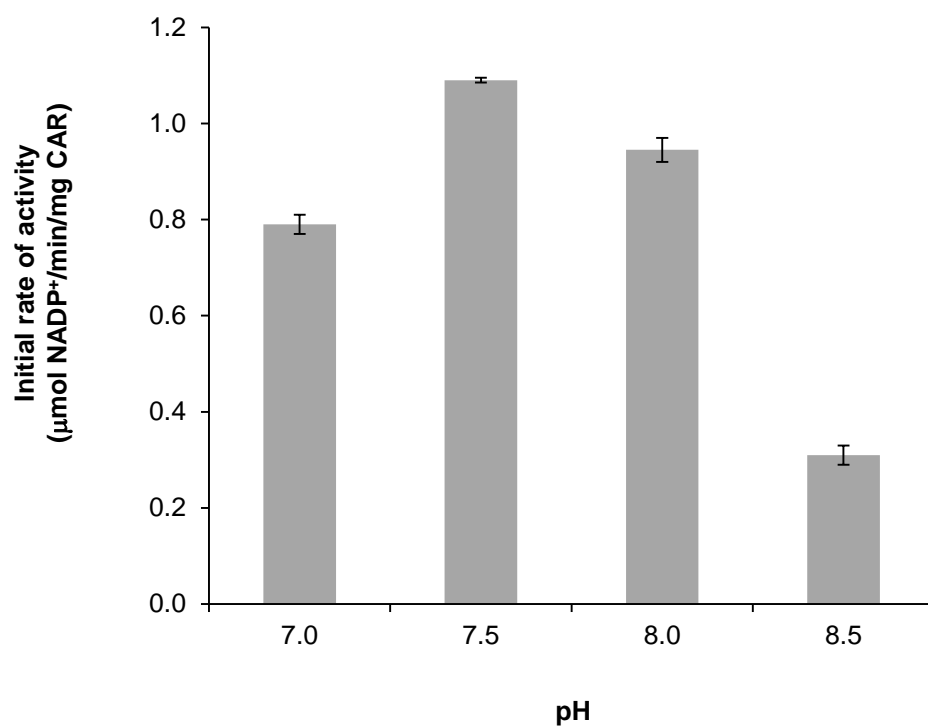

**Fig. S4** Effect of pH on CAR<sub>his</sub> activity. Reactions were carried out in 50 mM Tris-HCl buffer (21°C) containing purified CAR<sub>his</sub>, 2 mM benzoic acid, 1 mM ATP and 1 mM NADPH within the pH range of 7 to 8.5. The initial rate of CAR activity was determined from the rate of NADPH oxidation at 340 nm. Results are means ± SEM of duplicate experiments.

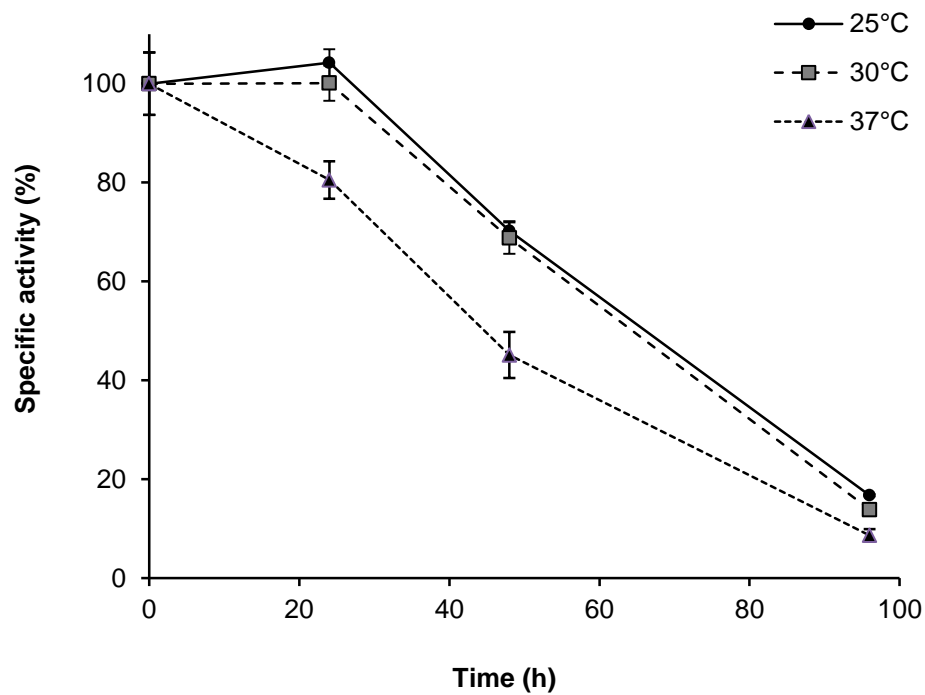

**Fig. S5** Thermostability of CAR<sub>his</sub>. In the absence of reducing agents, CAR<sub>his</sub> was incubated without shaking at three different temperatures; 25°C, 30°C and 37 °C; for up to 96 h in 50 mM Tris-HCl buffer (pH 7.5, 21°C). Samples were taken at specific time intervals and the initial rate of CAR activity determined in the presence of 2 mM benzoic acid, 1 mM ATP, 10 mM MgCl<sub>2</sub> and 1 mM NADPH. Results are means ± SEM. of duplicate experiments.

**A**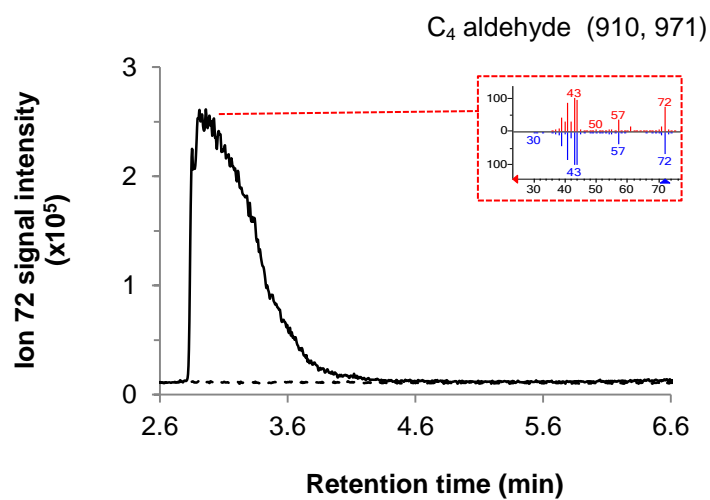**B**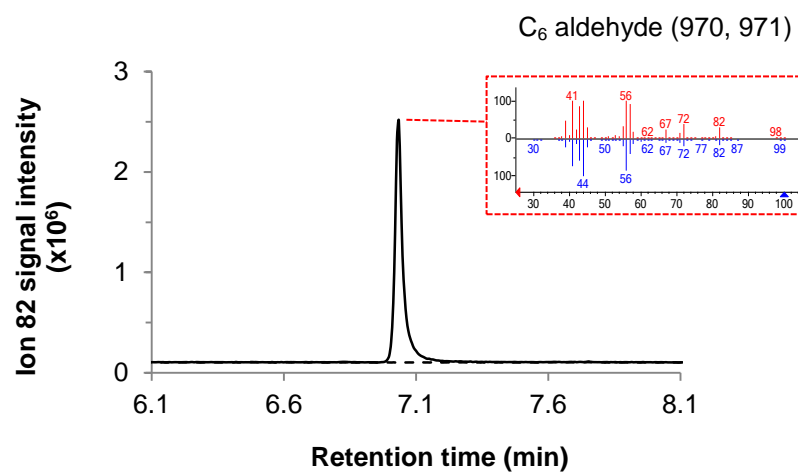**C**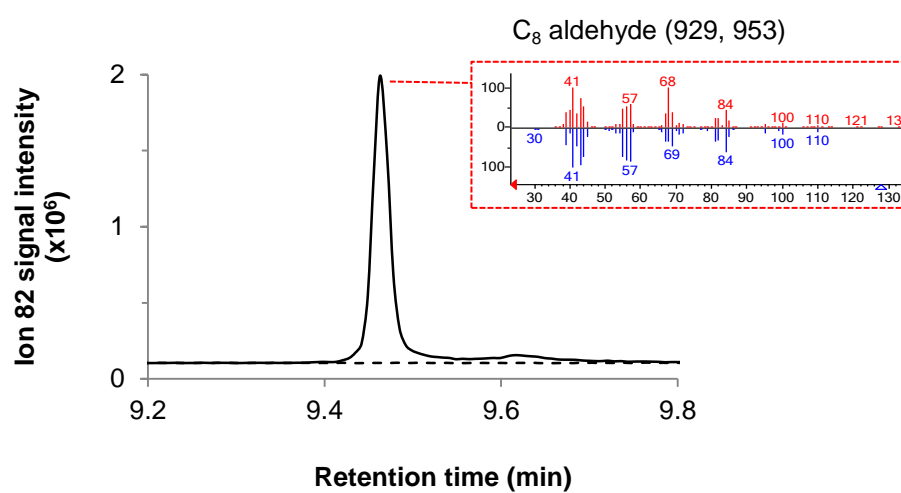

**D**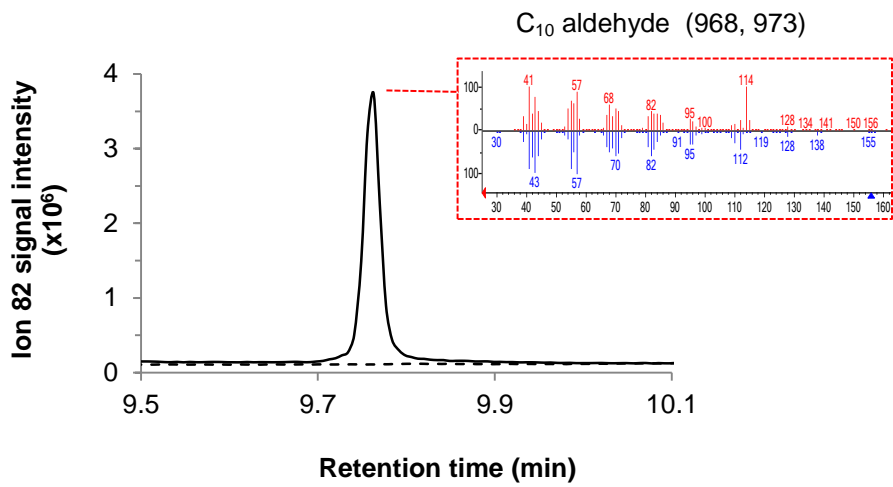**E**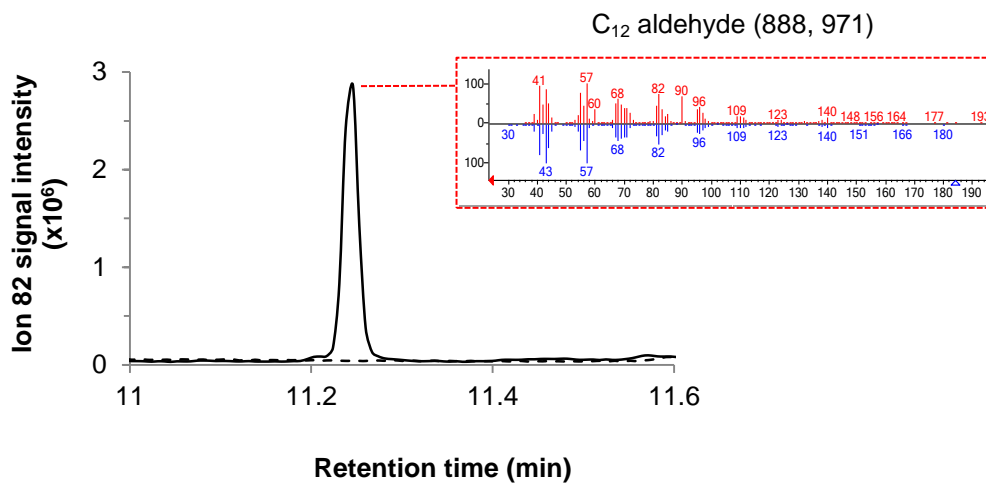**F**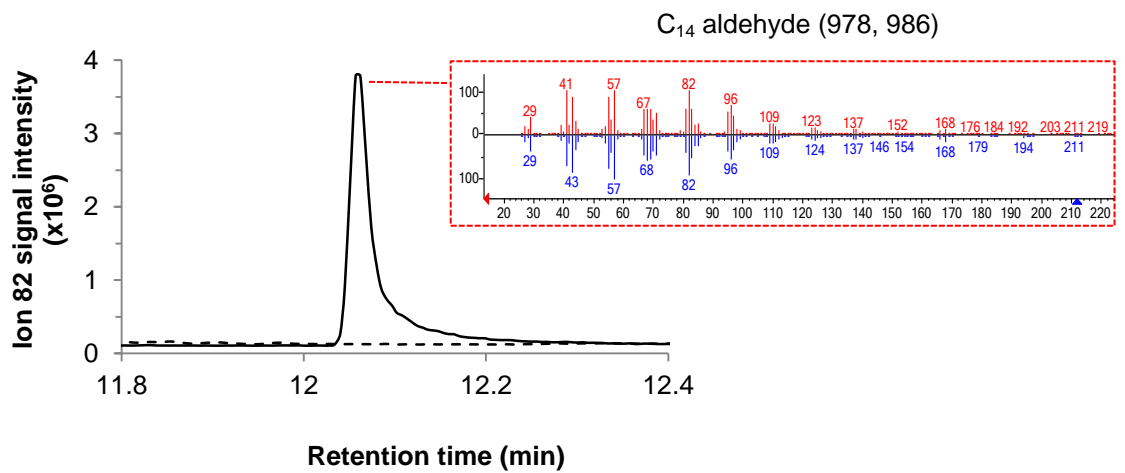

**G**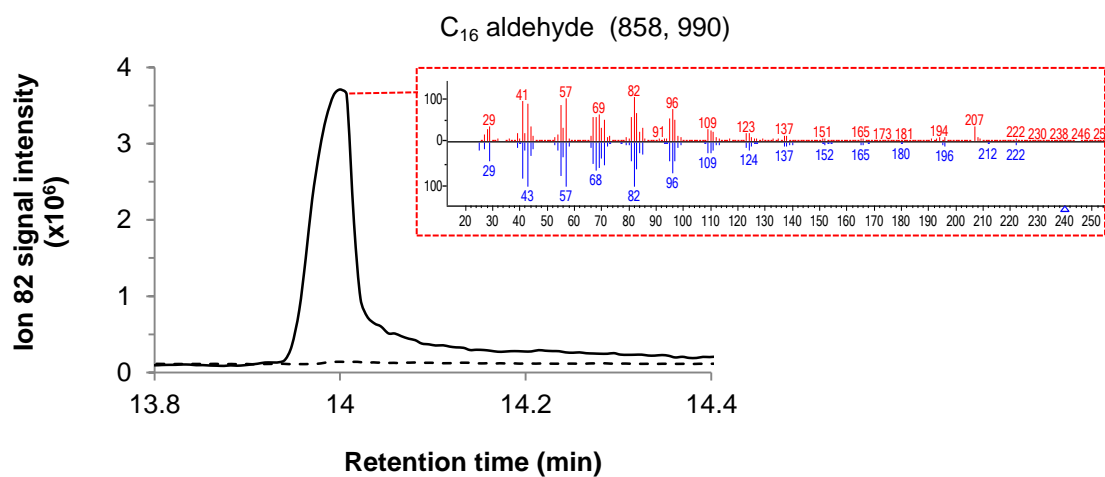**H**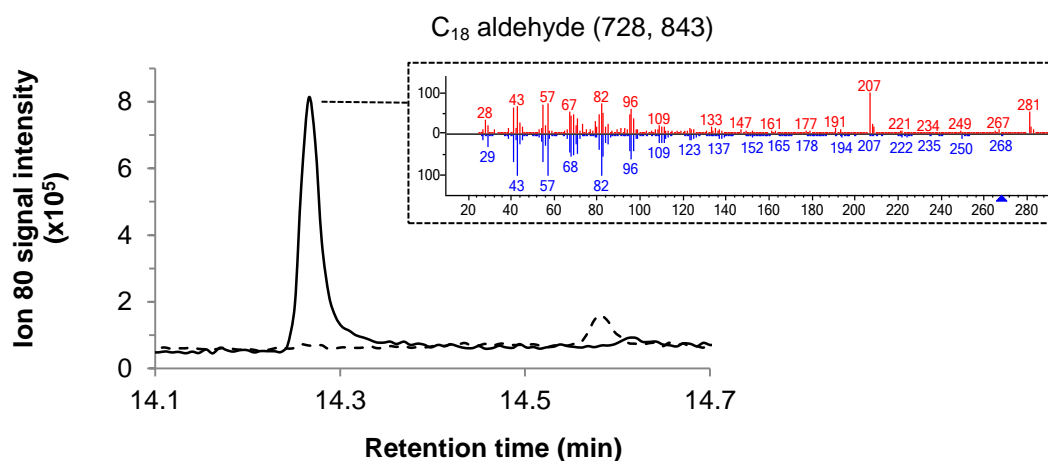**I**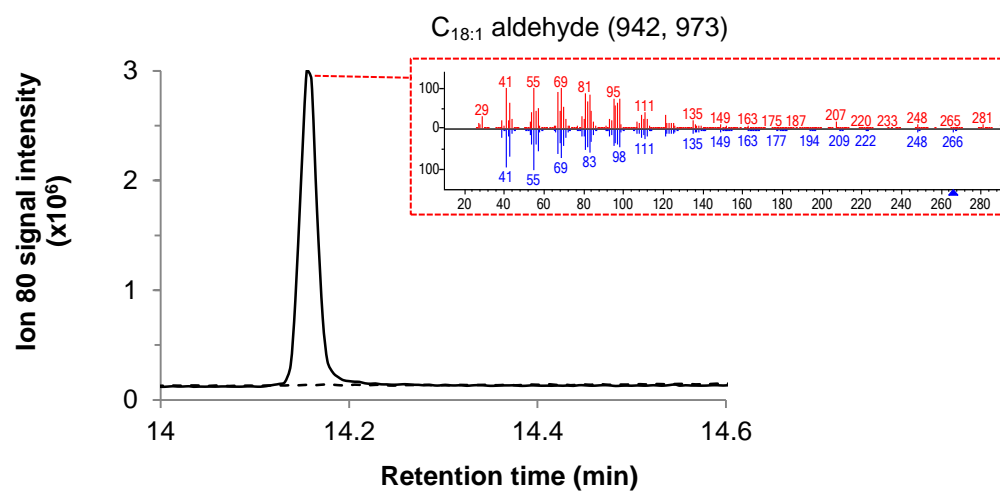

**J**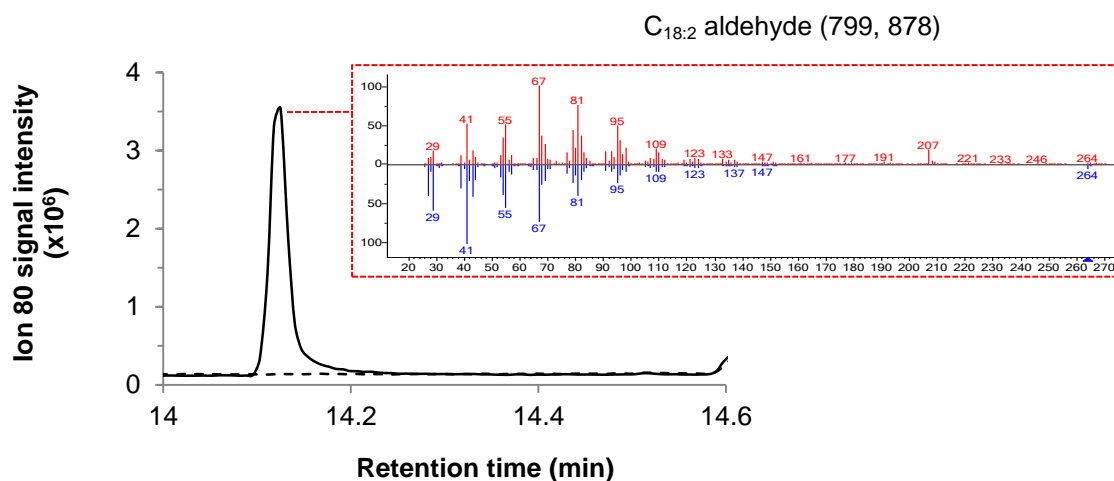**K**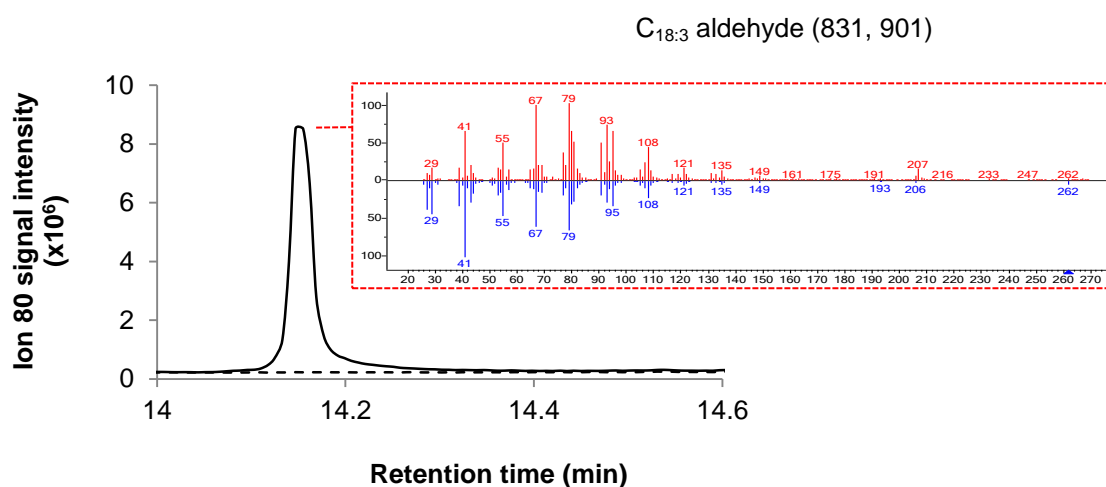

**Fig. S6** GC-MS confirmation of aldehyde synthesis by CAR<sub>his</sub>. Reactions were carried out in the presence of CAR<sub>his</sub> (100-300 µg/ml), 1 mM NADPH, 1 mM ATP, 10 mM MgCl<sub>2</sub> and 0.5mM C<sub>4</sub>-C<sub>18</sub> fatty acids (**A-K**). Reactions were incubated at 30 °C for up to 4 h or in the case of the longer chain substrates ( $\geq$  C<sub>16</sub>) up to 12 h. Reactions were mixed with chloroform and the organic phase analyzed by GC-MS (see Methods). For clarity, only the peak representing the aldehyde is shown. Dashed lines represent chromatograms without the addition of CAR<sub>his</sub>. Aldehyde formation was confirmed by comparing the mass spectrum of the analyte (in red) against reference standards (in blue) from the NIST spectral database. The match factors and reverse match factors quantitatively describe the spectral match between a sample spectrum and the library spectrum, and are indicated in brackets. The reverse match factor is obtained by excluding peaks that are present in the sample spectrum but not the library spectrum. Both values are derived from a modified cosine of the angle between the spectra, otherwise known as the normalized dot product. A value of 900 or greater signifies an excellent match; 800–900, a good match; and 700–800, a fair match.



**A**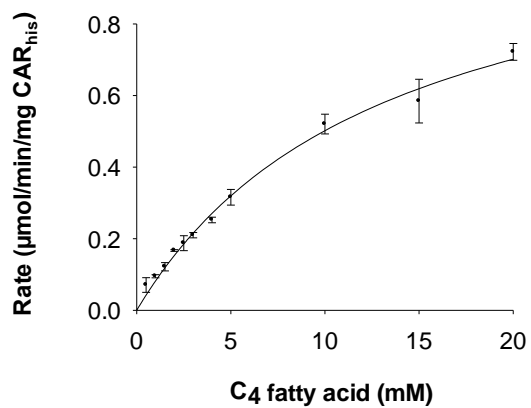**B**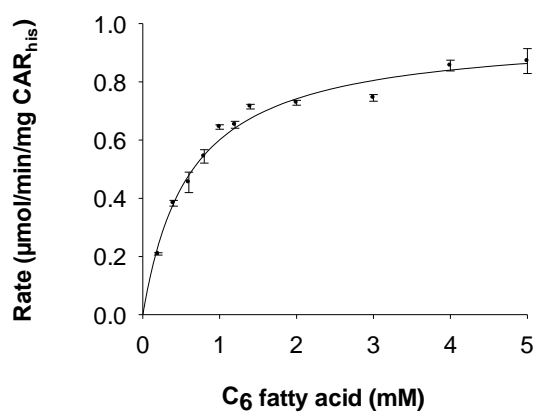**C**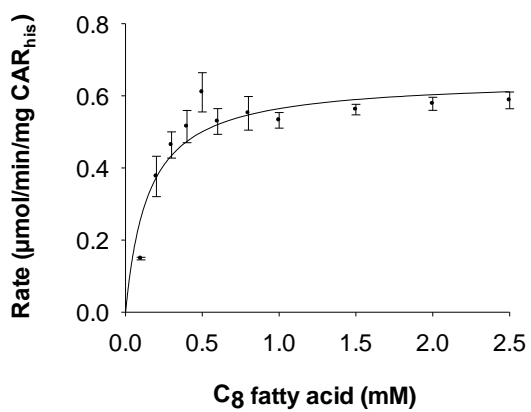**D**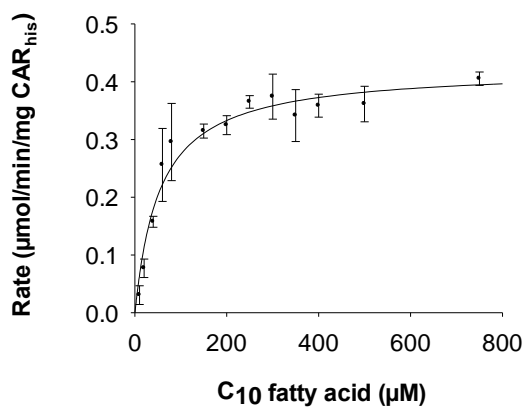**E**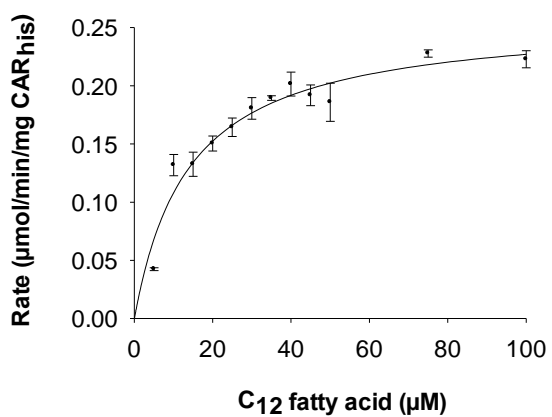

**Fig. S7.** Kinetic analysis of CAR<sub>his</sub> based on C<sub>4</sub> to C<sub>12</sub> saturated fatty acid substrates. Reactions were carried out in 50mM Tris-HCl buffer containing CAR (0.5 to 4 µg/ml), 1 mM NADPH and fatty acid substrates ranging from 0 to 20 mM. For the C<sub>4</sub> substrate, the buffering capacity was increased to 100mM. Reactions were monitored at 340nm at 30 s intervals. The apparent K<sub>m</sub> and V<sub>max</sub> values were determined from non-linear regression plots using the enzyme kinetics module of SigmaPlot (Systat Software, San Jose, CA). The saturated fatty acids evaluated were: **(A)** C<sub>4</sub> fatty acid (0.5-20 mM), **(B)** C<sub>6</sub> fatty acid (0.2-5 mM), **(C)** C<sub>8</sub> fatty acid (0.1-2.5 mM), **(D)** C<sub>10</sub> fatty acid (10-750 µM) and **(E)** C<sub>12</sub> fatty acid (5-100 µM). Results are means ± SEM of triplicate experiments.

**A**

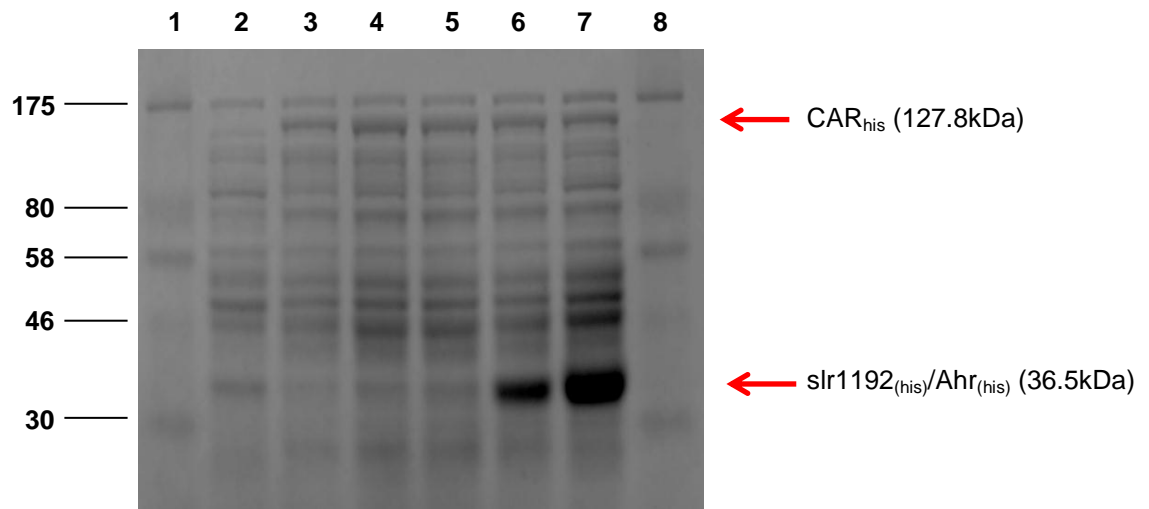

**B**

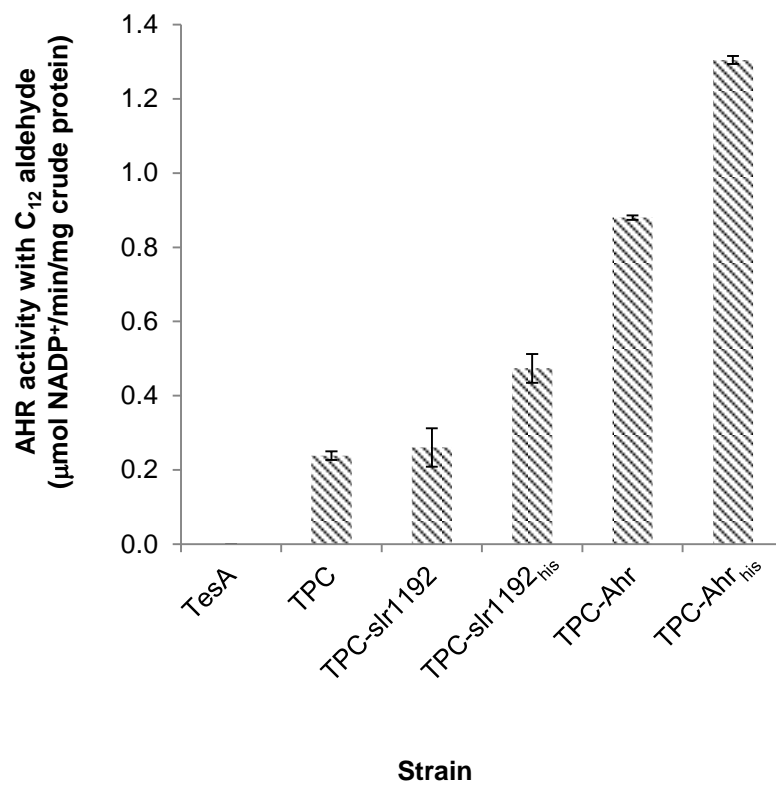

**Fig. S8.** Activity and expression levels of AHR in crude soluble fractions. **(A)** The crude fractions were analyzed by SDS-PAGE for expression levels of AHR. Lane 1, molecular-mass markers (in kDa); lane 2, crude fraction of TesA; lane 3, crude fraction of TPC; lane 4, crude fraction of TPC-slr1192; lane 5, crude fraction of TPC-slr1192<sub>his</sub>; lane 6, crude fraction of TPC-Ahr; lane 7, crude fraction of TPC-Ahr<sub>his</sub>; and lane 8, molecular-mass markers (in kDa). Proteins bands representing the CAR and AHR enzymes are indicated by red arrows. **(B)** AHR activity was determined in crude fractions of all fatty alcohol-producing strains using C<sub>12</sub> aldehyde as the substrate. The TesA strain was included as a negative control. Results are means  $\pm$  SEM of duplicate experiments.

```

slr1192  1  --MIKAYAALAEANGKLOPFHEYDPGALGANEVEIEVQYCGVCHSDLSMINNEWGTSNY
Ahr      1  MSMIKSYAAKEAGGELVYHEYDPGELRPODVENQVDYCGVCHSDLSMIDNEWGFSOY

slr1192  56  PLVPGHEVVGTVAAMGEGVN--HVEVGDVVGIGWHSGYCMTCHSCLSGYHNLCAEAE
Ahr      58  PLVAGHEVIGRVVALGSAACDKGLQVQQRVGIWGTARSCGHCDACTSGNQINCEQEA

slr1192  112 STIVGHYGGFGDRVRAKGVSVVVKLPKGLDLSAGPLFCGGITVFSPMVELSKPTAK
Ahr      116 VPTIMNRGGFAEKLRADWQWVILPENIDLESAGPLLCGGITVFKPLIMHHITATSR

slr1192  169 VAVIGIGGLGHIIVQFLRAWGCEVTAFTSSARKQTEVLEI GAHHIIDSINPEALASA
Ahr      173 VGVIGIGGLGHIATKLLHAMGCEVTAFTSNPAKEQEVLAAGADKVVNSRDPOALKAL

slr1192  226 EGKFDYIISTVNLKLDWNLVISTLAPQGHFHFVGVVLEPLDNLFPILMGORSVSAS
Ahr      230 AGQFDLIINTVNVSLDWQPYFEALTYGQNFHTVGAVLTPLSVPAFTLAGDRSVSGS

slr1192  282 PVGSPATL IATMLDFAVRHDIKPVVEQFSFDQINEAIAHLES GKAFYRVVLSHSKN
Ahr      286 ATGIPYEIRKLMRFAARSKVAPTTELEPMSKINDAIOHVRD GKAFYRVVLSKADF-

```

**Fig. S9.** Amino acid sequence alignment of *E. coli* Ahr and *Synechocystis* sp. PCC 6803 slr1192. Sequences were aligned using ClustalW 1.8 (<http://www.ebi.ac.uk/Tools/msa/>) (8) and formatted using Boxshade 3.21 ([http://www.ch.embnet.org/software/BOX\\_form.html](http://www.ch.embnet.org/software/BOX_form.html)). Dark-shaded boxes depict identical amino acids, while lighter-shaded boxes signify amino acid residues with similar properties. Conserved amino acid residues for zinc binding are highlighted in red.

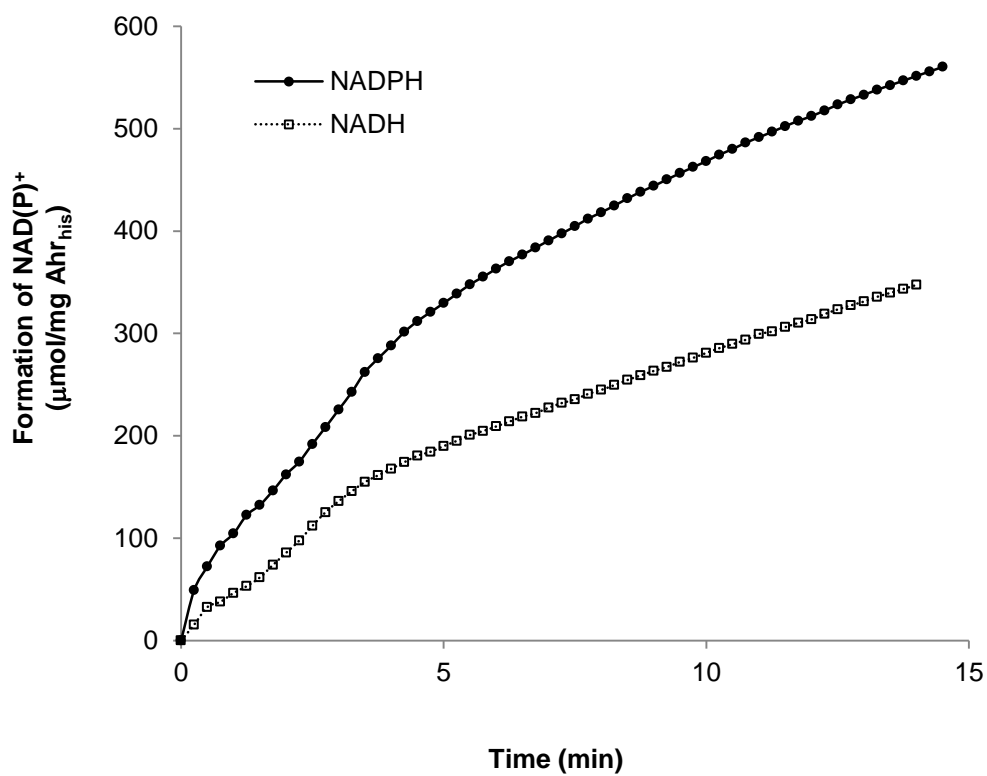

**Fig. S10.** NADPH specificity of Ahr<sub>his</sub>. Reactions were carried out in 50 mM Tris-HCl (pH 7.5, 21°C) buffer containing Ahr<sub>his</sub> (1 μg /ml), 0.5 mM NADPH or NADH and 0.5 mM C<sub>6</sub> aldehyde. Absorbance was monitored at 340 nm at 15 s intervals over a 15 min period.

**A**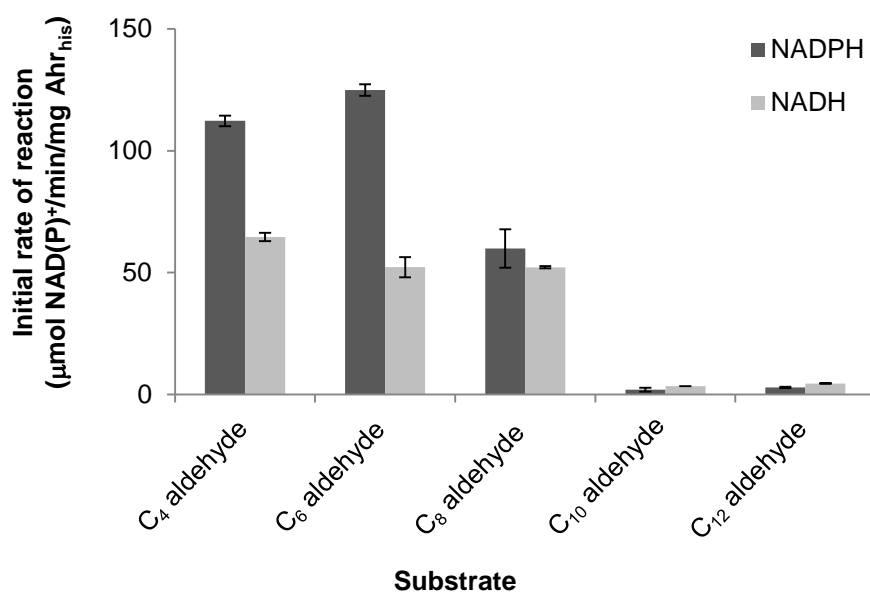**B**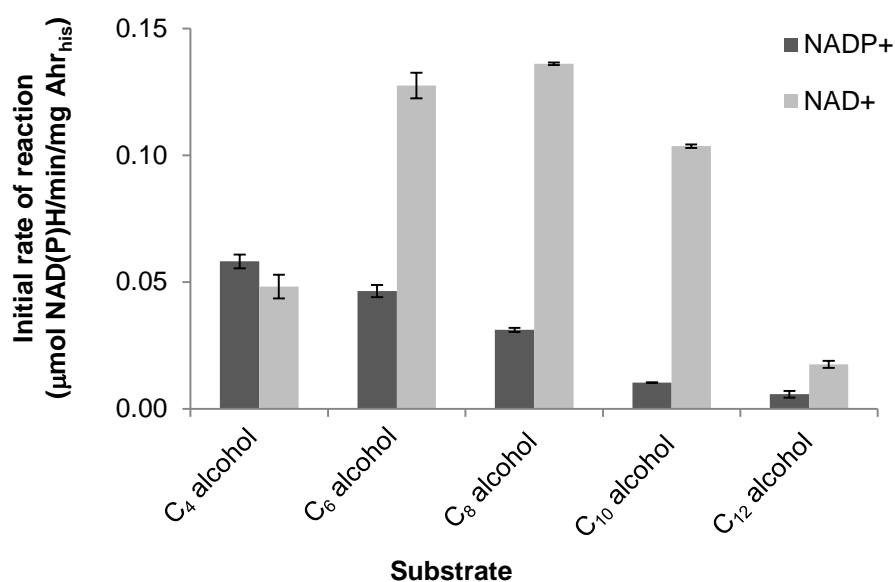

**Fig. S11.** Substrate specificity of Ahr<sub>his</sub>. Reactions were carried out in 50mM Tris-HCl buffer containing Ahr<sub>his</sub> (1  $\mu\text{g}$  or 10  $\mu\text{g}$  /ml) , 0.5 mM NAD(P)H or NAD(P)<sup>+</sup> with either (A) 0.5mM aldehydes (C<sub>4</sub>-C<sub>12</sub>) or (B) 0.5 mM alcohols (C<sub>4</sub>-C<sub>12</sub>). Initial rates for both reactions were determined from the rate of NAD(P)H oxidation or NAD(P)<sup>+</sup> reduction. Results are means  $\pm$  SEM of duplicate experiments.

**A****C<sub>4</sub> alcohol (899, 916)**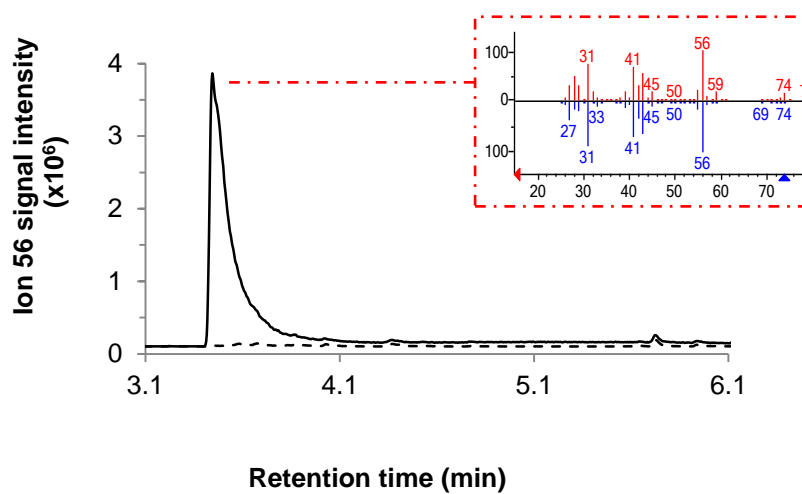**B****C<sub>6</sub> alcohol (918, 923)**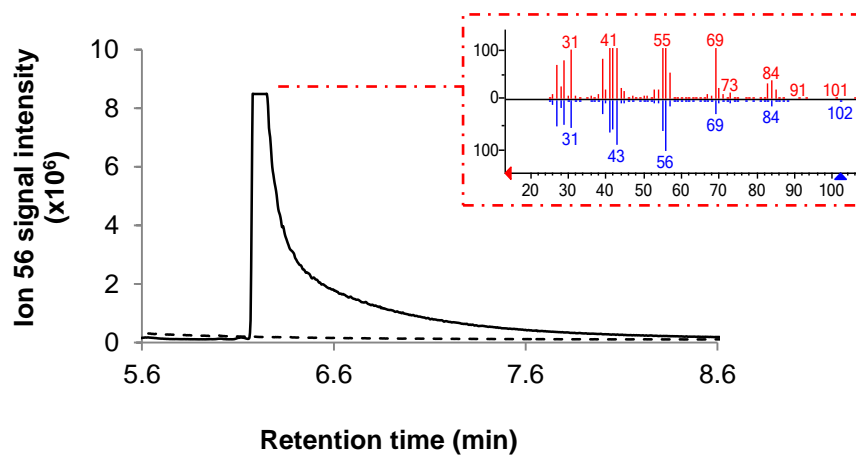**C****C<sub>8</sub> alcohol (940, 969)**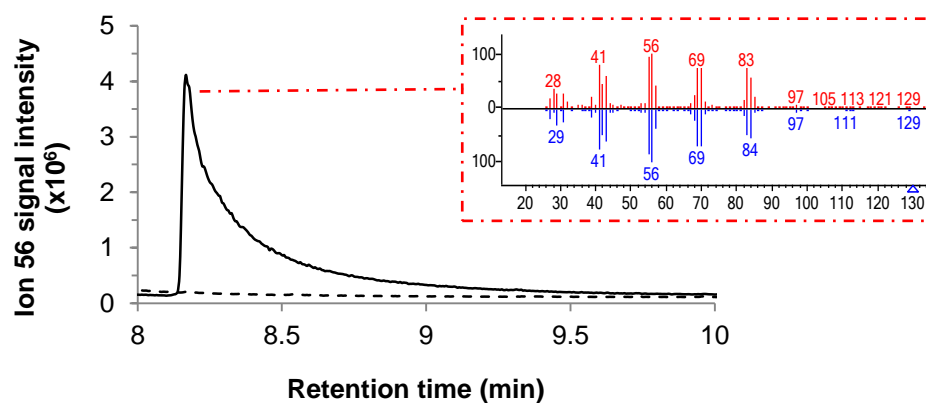



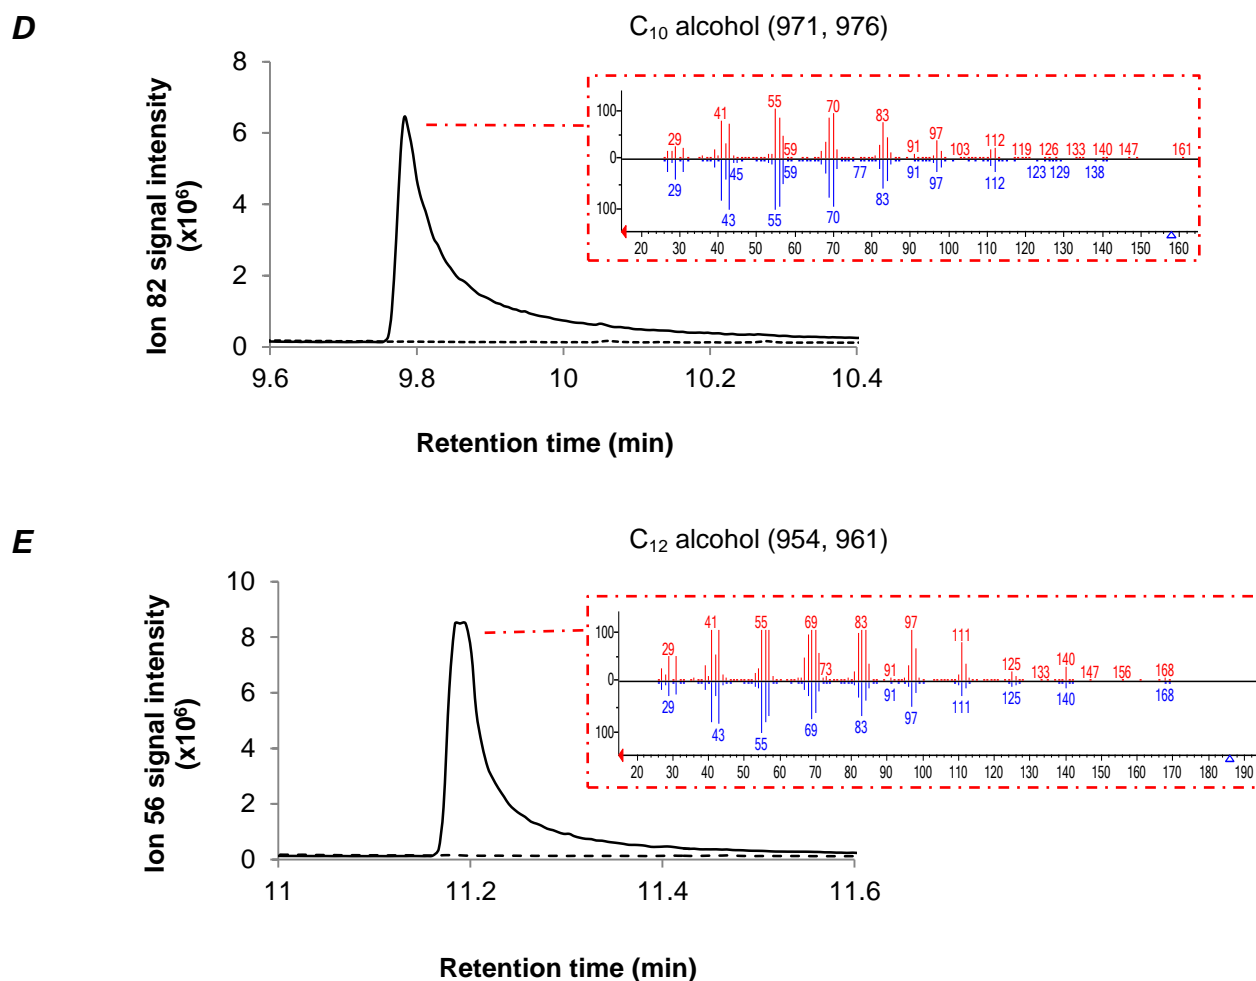

**Fig. S12.** GC-MS verification of alcohol synthesis by Ahr<sub>his</sub>. Reactions were carried out in 50mM Tris-HCl buffer containing Ahr<sub>his</sub> (10-30  $\mu$ g/ml), 1 mM NADPH and 0.5mM C<sub>4</sub>-C<sub>12</sub> aldehydes (**A-E**). Reactions were incubated at 30 °C for up to 2 h and terminated by addition of chloroform. The organic phase analyzed by GC-MS (see Methods). For clarity, only the peak representing the alcohol is shown. Dashed lines represent chromatograms without the addition of the enzyme. Alcohol formation was confirmed by comparing the mass spectrum of the analyte (in red) against reference standards (in blue) from the NIST spectral database. The match factors and reverse match factors are indicated in brackets. Refer to **Fig. S6** for explanation of (reverse) match factors.

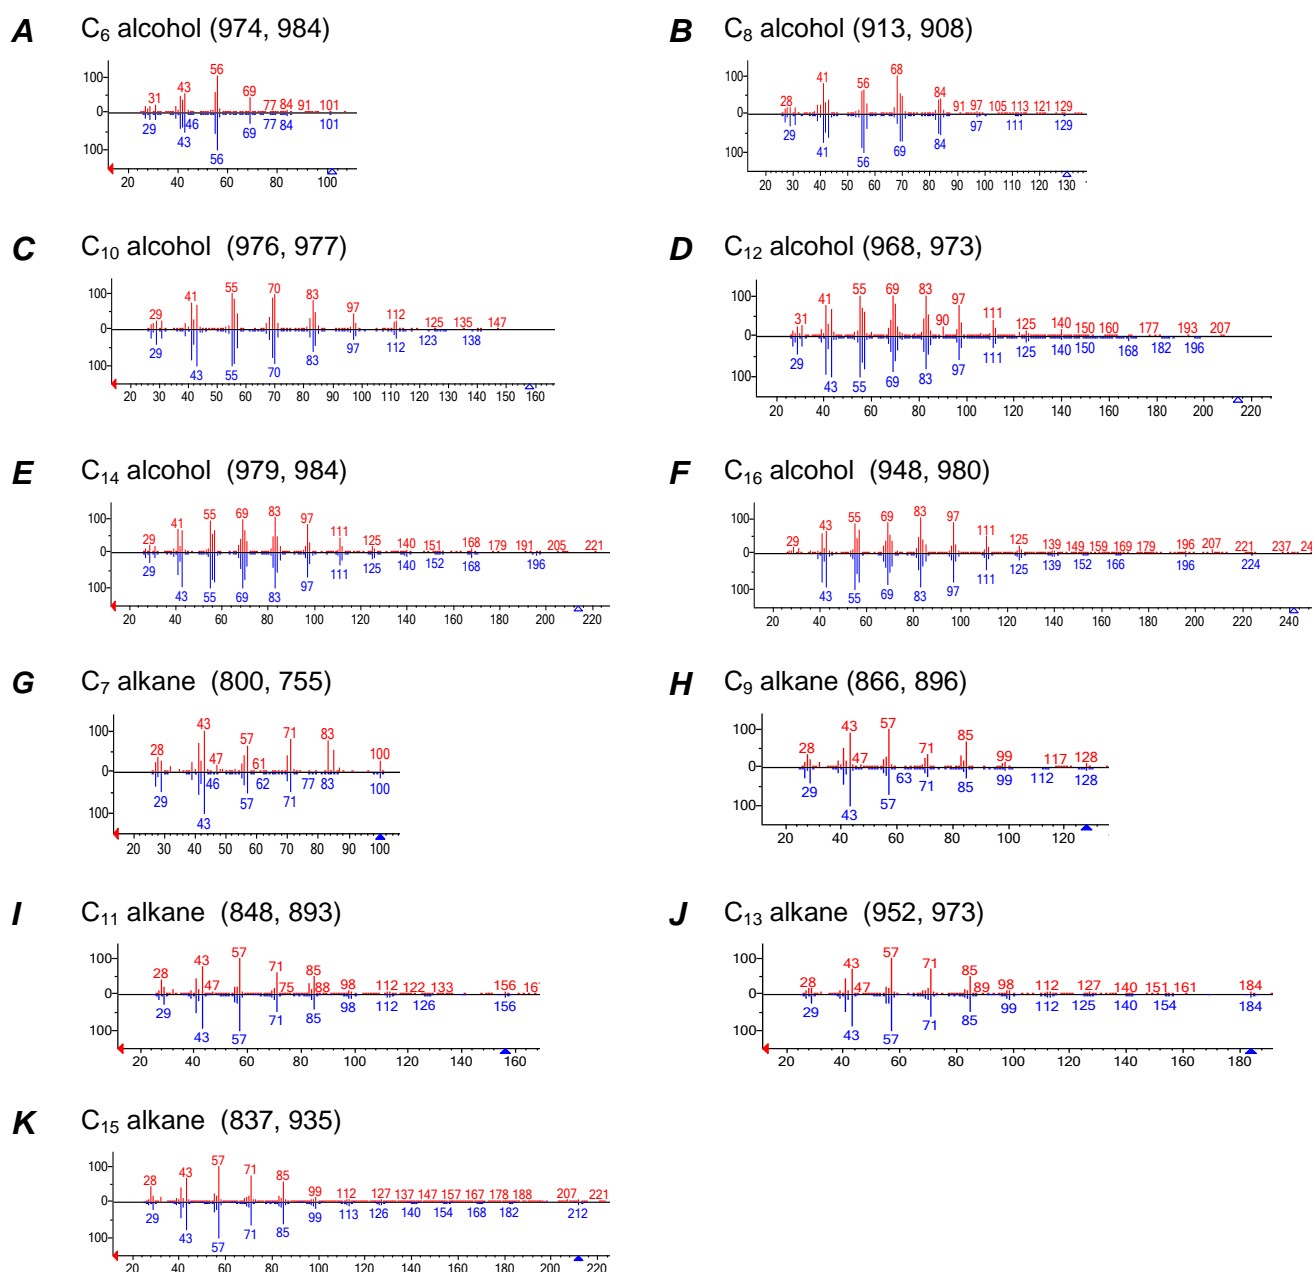

**Fig. S13.** GC-MS confirmation of enzyme-mediated formation of alcohols and alkanes. Alcohol (**A-F**) and alkane formation (**G-K**) were verified by comparing the mass spectrum of the analyte (in red) against the reference standards (in blue) from the NIST spectral database. The match factors and reverse match factors are indicated in brackets. Refer to **Fig. S6** for explanation of (reverse) match factors.

**A**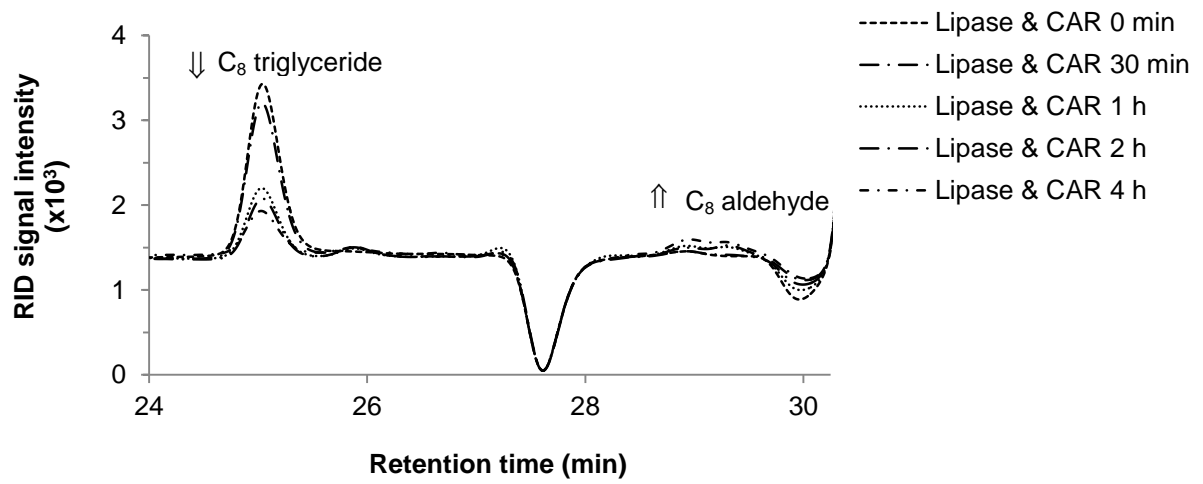**B**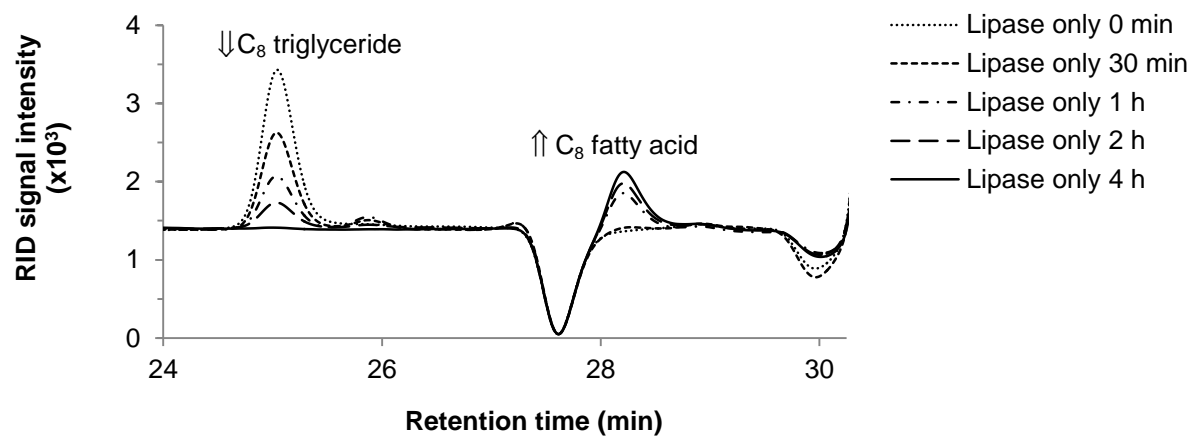**C**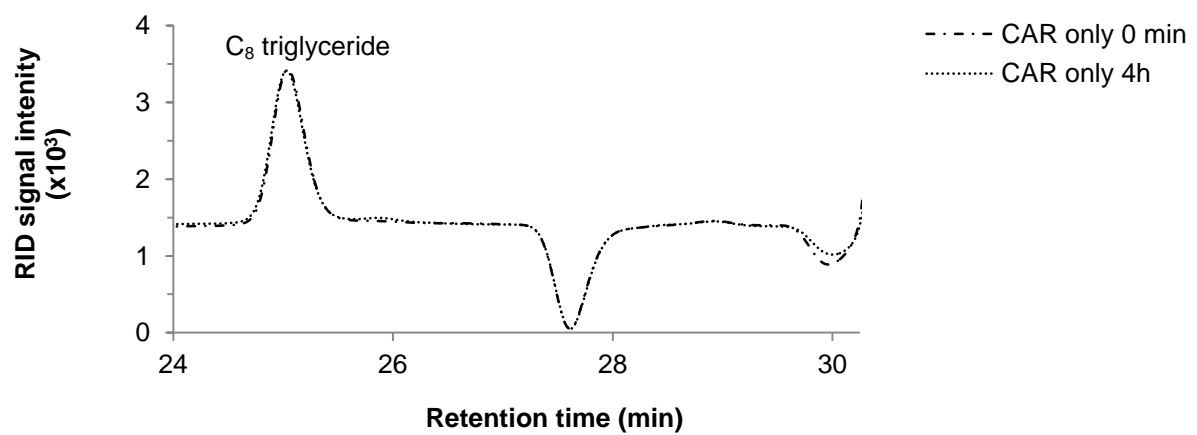

**D**

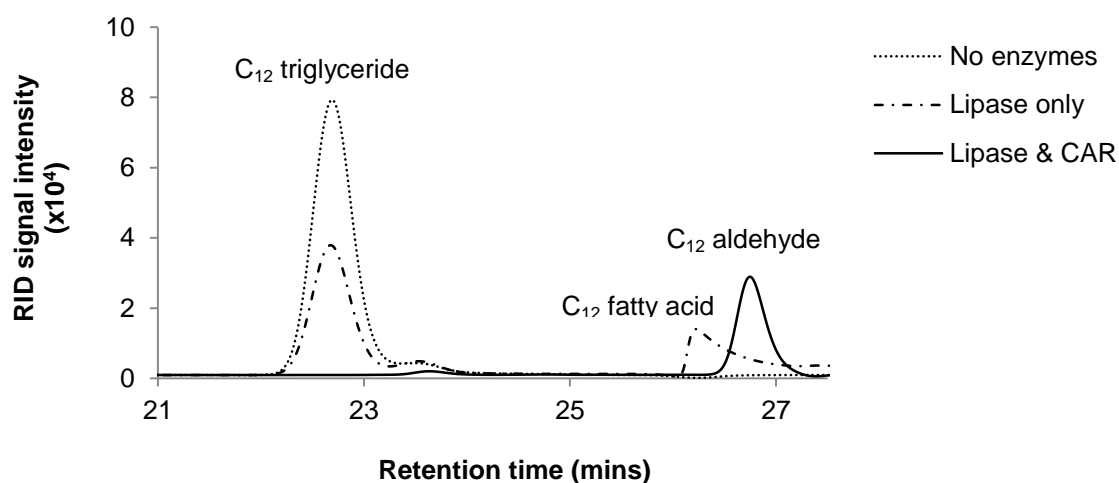

**Fig. S14.** Conversion of TAGs to fatty acids and aldehydes. Reactions were performed in 50 mM Tris-HCl (pH 7.5, 21°C) containing 2 mM NADPH, 2 mM ATP, 10 mM MgCl<sub>2</sub> and 0.5 mM C<sub>8</sub>-TAG (glyceryl trioctanoate) in the presence of (A) lipase and CAR enzymes (B) lipase only (0.1 mg/ml) and (C) CAR only (0.3 mg/ml). A further reaction using (D) C<sub>12</sub>-TAG (glyceryl trilaurate) as the substrate was also carried out.

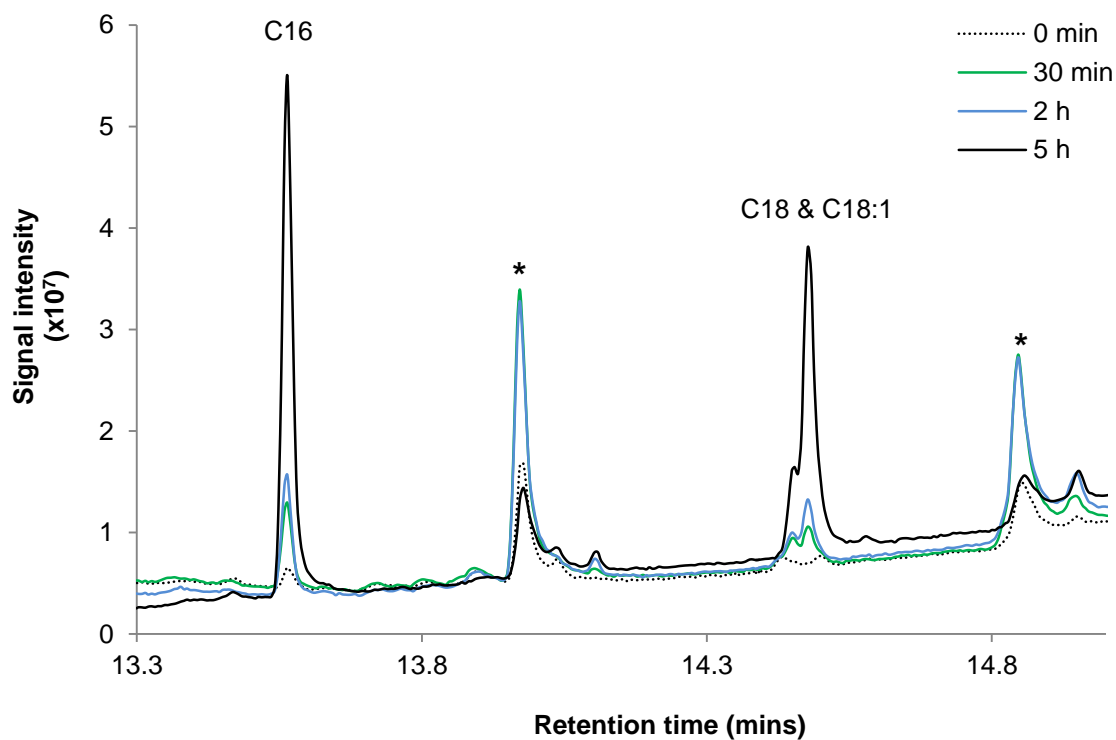

**Fig. S15.** *In vivo* synthesis of fatty alcohols using palm oil as substrate. Harvested cells from a preinduced culture of PC-Ahr<sub>his</sub>, were resuspended in 50 mM potassium phosphate buffered medium, supplemented with glucose and lipase (1 mg/ml) and incubated at 30 °C with shaking at 150 rpm for up to 5 h in the presence of palm oil. Asterisk denotes fatty acid.

**Table S1: Key features of the fatty acyl-ACP/TAG to fatty alcohol-producing systems.** Enzyme abbreviations according to the legend of Figure 1.

| Fatty alcohol producing system              | Direct co-substrate requirement | Typical reaction(s) catalyzed*                                                                                                                                                                                                                                                                                                                                                             | $\Delta G$ (kJ mol <sup>-1</sup> )                       | In vivo range of fatty alcohols** |     |     |     |     |     | Yield of fatty alcohols (mg L <sup>-1</sup> ) | Reference |
|---------------------------------------------|---------------------------------|--------------------------------------------------------------------------------------------------------------------------------------------------------------------------------------------------------------------------------------------------------------------------------------------------------------------------------------------------------------------------------------------|----------------------------------------------------------|-----------------------------------|-----|-----|-----|-----|-----|-----------------------------------------------|-----------|
|                                             |                                 |                                                                                                                                                                                                                                                                                                                                                                                            |                                                          | C8                                | C10 | C12 | C14 | C16 | C18 |                                               |           |
| Lipase or TesA<br>+ Sfp<br>+ CAR<br>+ Ahr   | ATP<br>2 NADPH                  | C <sub>8</sub> -TAG + 3 H <sub>2</sub> O → 3 C <sub>8</sub> fatty acid + glycerol<br>C <sub>12</sub> -ACP + H <sub>2</sub> O → C <sub>12</sub> fatty acid + ACP<br>C <sub>12</sub> fatty acid + NADPH + H <sup>+</sup> + ATP → NADP <sup>+</sup> + AMP + PPi + C <sub>12</sub> aldehyde<br>C <sub>12</sub> aldehyde + NADPH + H <sup>+</sup> → C <sub>12</sub> alcohol + NADP <sup>+</sup> | -32.1<br>-21.5<br>+4.4<br>-18.8<br><b>-46.5 or -35.9</b> |                                   |     |     |     |     |     | ~360                                          | This work |
| FatB or TesA<br>+ FadD<br>+ Acr1            | ATP<br>2 NADPH<br>CoA           | C <sub>12</sub> -ACP + H <sub>2</sub> O → C <sub>12</sub> fatty acid + ACP<br>C <sub>12</sub> fatty acid + CoA + ATP → C <sub>12</sub> -CoA + AMP + PPi<br>C <sub>12</sub> -CoA + NADPH + H <sup>+</sup> → C <sub>12</sub> aldehyde + NADP <sup>+</sup> + CoA<br>C <sub>12</sub> aldehyde + NADPH + H <sup>+</sup> → C <sub>12</sub> alcohol + NADP <sup>+</sup>                           | -21.5<br>-10.5<br>+14.9<br>-18.8<br><b>-35.9</b>         |                                   |     |     |     |     |     | ~60                                           | 9         |
| AAR<br>+ native aldehyde reductase activity | 2 NADPH                         | C <sub>12</sub> -ACP + NADPH + H <sup>+</sup> → C <sub>12</sub> aldehyde + NADP <sup>+</sup> + ACP<br>C <sub>12</sub> aldehyde + NADPH + H <sup>+</sup> → C <sub>12</sub> alcohol + NADP <sup>+</sup>                                                                                                                                                                                      | +14.9<br>-18.8<br><b>-3.9</b>                            |                                   |     |     |     |     |     | ~140                                          | 10        |

\*Calculation of  $\Delta G$  values under standard conditions performed with eQuilibrator (4)

\*\*Green box=detectable levels of fatty alcohols, grey box = undetected fatty alcohols

**Table S2: Substrate specificity and turnovers of the metabolic enzymes required for fatty-acyl ACP to fatty alcohol conversion**

| Enzyme  | Accession number | <i>In vitro</i> substrate specificity of metabolic enzymes* |    |     |     |     |     |     |     | Apparent or observed maximal $K_{cat}$ (turnover/min)                         | Reference     |
|---------|------------------|-------------------------------------------------------------|----|-----|-----|-----|-----|-----|-----|-------------------------------------------------------------------------------|---------------|
|         |                  | C6                                                          | C8 | C10 | C12 | C14 | C16 | C18 | C20 |                                                                               |               |
| TesA    | C6EKX0           |                                                             |    |     |     |     |     |     |     | ~5 (for C18:1)                                                                | 11            |
| CAR     | B2HN69           |                                                             |    |     |     |     |     |     |     | ~27 (for C18:1)                                                               | This work     |
| Ahr     | C6EC82           |                                                             |    |     |     |     |     |     |     | ~109 (for C12)                                                                | This work     |
| ADC     | Q7V6D4           |                                                             |    |     |     |     |     |     |     | ~0.1 (for C18:1)                                                              | This work, 10 |
| AAR     | Q54765           |                                                             |    |     |     |     |     |     |     | ~0.01 (for C18:1)                                                             | 10            |
| FadD    | C5W549           |                                                             |    |     |     |     |     |     |     | ~16 (for C18:1)                                                               | 12            |
| Acr1**  | P94129           |                                                             |    |     |     |     |     |     |     | ~0.003 (for C16)                                                              | 13            |
| ACR2*** | A1U3L3           |                                                             |    |     |     |     |     |     |     | ~3 (for C18:1) (acyl coA to aldehyde)<br>~550 (for C12) (aldehyde to alcohol) | 14            |

\*Green box=observed activity, blue box= undetected activity, grey box = untested substrates

\*\*Partially purified enzyme.

\*\*\*Purified ACR2 from *Marinobacter aquaeolei* VT8

**Table S3. List of the primers and templates used for gene(s) amplification.**

| Gene(s)                               | PCR template                     | Primers employed <sup>a</sup>                                                                                                                                                |
|---------------------------------------|----------------------------------|------------------------------------------------------------------------------------------------------------------------------------------------------------------------------|
| <i>tesA</i>                           | <i>E. coli</i> BL21 (DE3)        | FP: 5'- <u>aaccatggc</u> ggacacggttattgattctgggtgatagcc -3'<br>RP: 5'- aaaagctttatgagtcgatgattactaaaggctgcaactgctcg -3'                                                      |
| <i>slr1192</i>                        | <i>Synechocytis</i> sp. PCC 6803 | FP: 5'- <u>attaatcatatg</u> attaagcctacgctgccctggaag -3'<br>RP: 5'- aacctaggtatggctgagcactacccgataatgggc -3'                                                                 |
| <i>ahr</i>                            | <i>E. coli</i> BL21 (DE3)        | FP: 5'- <u>attaatccatggt</u> ctagataattaatggatccaggaggaaacatatgtcgcgatgataaaaagctatgccgcaaaaag -3'<br>RP: 5'- <u>attaatcctagga</u> agcttctcgagtcaaaaatcggctttcaaccacgcgg -3' |
| <i>ahr<sub>his</sub></i>              | <i>E. coli</i> BL21 (DE3)        | FP: 5'- <u>attaatccatggg</u> ccaccaccaccaccaccacggcagccatatgtcgcgatgataaaaagctatgccgcaaaaagaag -3'<br>RP: 5'- <u>attaatcctagga</u> agcttctcgagtcaaaaatcggctttcaaccacgcgg -3' |
| <i>adc<sub>his</sub></i>              | pET28-ADC <sub>his</sub>         | FP: 5'- <u>attaatccatggc</u> acaccaccaccaccaccaccaa -3'<br>RP: 5'- <u>attaatcctaggt</u> tacaccatccgtgccgcagcc -3'                                                            |
| <i>sfp</i> + <i>car<sub>his</sub></i> | pET-TPC                          | FP: 5'- <u>attaatccatggg</u> caagatctacggcatatacatggaccgcc -3'<br>RP: 5'- <u>aataatcctaggg</u> aattcttacagcaggcccag -3'                                                      |

<sup>a</sup> Restriction enzyme sites are underlined and italicized

Abbreviations used: FP, forward primer; RP, reverse primer



**Table S4. Summary of the vector backbone and gene(s) inserts used for plasmid construction.**

| Plasmid                     | Ligated fragments <sup>a</sup>                 |                                                             |
|-----------------------------|------------------------------------------------|-------------------------------------------------------------|
|                             | Vector backbone                                | Gene(s) insert                                              |
| pET-TPC                     | pET-BPC ( <i>NcoI/HindIII</i> )                | <i>tesA</i> ( <i>NcoI/HindIII</i> )                         |
| pET-TP                      | pET-TPC ( <i>EcoRI</i> )                       | n/a                                                         |
| pET-PC                      | pET-TP ( <i>NcoI/EcoRI</i> )                   | <i>sfp</i> + <i>car<sub>his</sub></i> ( <i>NcoI/EcoRI</i> ) |
| pET-TesA                    | pET-TP ( <i>BamHI</i> )                        | n/a                                                         |
| pCDF-slrl192                | pCDF-Ahr ( <i>NdeI/AvrII</i> )                 | <i>slr1192</i> ( <i>NdeI/AvrII</i> )                        |
| pCDF-slrl192 <sub>his</sub> | pCDF- Ahr <sub>his</sub> ( <i>NdeI/AvrII</i> ) | <i>slr1192</i> ( <i>NdeI/AvrII</i> )                        |
| pCDF-Ahr                    | pCDF-Duet1 ( <i>NcoI/AvrII</i> )               | <i>ahr</i> ( <i>NcoI/AvrII</i> )                            |
| pCDF- Ahr <sub>his</sub>    | pCDF-Duet1 ( <i>NcoI/AvrII</i> )               | <i>ahr<sub>his</sub></i> ( <i>NcoI/AvrII</i> )              |
| pCDF- ADC <sub>his</sub>    | pCDF-Duet1 ( <i>NcoI/AvrII</i> )               | <i>adc<sub>his</sub></i> ( <i>NcoI/AvrII</i> )              |

<sup>a</sup> Restriction enzyme cuts are specified in brackets.

**Table S5. List of the plasmids used in the study including their properties.**

| <b>Plasmid</b>               | <b>Recombinant proteins encoded</b> | <b>Source</b> |
|------------------------------|-------------------------------------|---------------|
| pETDuet-1                    | None                                | Novagen       |
| pCDFDuet-1                   | None                                | Novagen       |
| pET28-ADC <sub>his</sub>     | ADC <sub>his</sub>                  | 2             |
| pCDF-ADC <sub>his</sub>      | ADC <sub>his</sub>                  | This study    |
| pET-TesA                     | TesA                                | This study    |
| pET-TP                       | TesA & Sfp                          | This study    |
| pET-PC                       | Sfp & Car <sub>his</sub>            | This study    |
| pET-TPC                      | TesA, Sfp & Car <sub>his</sub>      | This study    |
| pCDF-slrl1192                | slr1192                             | This study    |
| pCDF-slrl1192 <sub>his</sub> | slr1192 <sub>his</sub>              | This study    |
| pCDF-Ahr                     | Ahr                                 | This study    |
| pCDF-Ahr <sub>his</sub>      | Ahr <sub>his</sub>                  | This study    |

**Table S6. List of *E. coli* strains engineered in the study.**

| Strain name                | Host strain | Plasmids/genotype                                             | Recombinant proteins induced                           | Source or reference |
|----------------------------|-------------|---------------------------------------------------------------|--------------------------------------------------------|---------------------|
| BL21(DE3)                  | -----       | F- <i>ompT hsdS<sup>B</sup></i> (rB-mB-) <i>gal dcm</i> (DE3) | -----                                                  | Novagen             |
| Control                    | BL21(DE3)   | pETDuet-1, pCDFDuet-1                                         | None                                                   | This study          |
| slr1192                    | BL21(DE3)   | pCDF-slr1192                                                  | slr1192                                                | This study          |
| slr1192 <sub>his</sub>     | BL21(DE3)   | pCDF-slr1192 <sub>his</sub>                                   | slr1192 <sub>his</sub>                                 | This study          |
| Ahr                        | BL21(DE3)   | pCDF-Ahr                                                      | Ahr                                                    | This study          |
| Ahr <sub>his</sub>         | BL21(DE3)   | pCDF- Ahr <sub>his</sub>                                      | Ahr <sub>his</sub>                                     | This study          |
| TesA                       | BL21(DE3)   | pET-TesA, pCDF-Empty                                          | TesA                                                   | This study          |
| ADC <sub>his</sub>         | BL21(DE3)   | pET28-ADC <sub>his</sub>                                      | ADC <sub>his</sub>                                     | This study          |
| TP                         | BL21(DE3)   | pET-TP, pCDF-Empty                                            | TesA & Sfp                                             | This study          |
| PC                         | BL21(DE3)   | pET-PC, pCDF-Empty                                            | Sfp & CAR <sub>his</sub>                               | This study          |
| PC-Ahr <sub>his</sub>      | BL21(DE3)   | pET-PC, pCDF- Ahr <sub>his</sub>                              | Sfp, CAR <sub>his</sub> & Ahr <sub>his</sub>           | This study          |
| TPC                        | BL21(DE3)   | pET-TPC, pCDF-Empty                                           | TesA, Sfp & CAR <sub>his</sub>                         | This study          |
| TPC-slr1192                | BL21(DE3)   | pET-TPC, pCDF-slr1192                                         | TesA, Sfp, CAR <sub>his</sub> & slr1192                | This study          |
| TPC-slr1192 <sub>his</sub> | BL21(DE3)   | pET-TPC, pCDF-slr1192 <sub>his</sub>                          | TesA, Sfp, CAR <sub>his</sub> & slr1192 <sub>his</sub> | This study          |
| TPC-Ahr                    | BL21(DE3)   | pET-TPC, pCDF-Ahr                                             | TesA, Sfp, CAR <sub>his</sub> & Ahr                    | This study          |
| TPC-Ahr <sub>his</sub>     | BL21(DE3)   | pET-TPC, pCDF-Ahr <sub>his</sub>                              | TesA, Sfp, CAR <sub>his</sub> & Ahr <sub>his</sub>     | This study          |
| TPC-ADC <sub>his</sub>     | BL21(DE3)   | pET-TPC, pCDF-ADC <sub>his</sub>                              | TesA, Sfp, CAR <sub>his</sub> & ADC <sub>his</sub>     | This study          |

**Table S7. List of the enzymes used to engineer the metabolic pathways**

| Enzyme                 | Organism source                  | Enzyme encoded for              | Enzyme modifications    | Enzyme accession number | Reference  |
|------------------------|----------------------------------|---------------------------------|-------------------------|-------------------------|------------|
| TesA                   | <i>E. coli</i>                   | Acyl-ACP/CoA thioesterase       | Signal sequence removed | C6EKX0                  | 15         |
| Sfp                    | <i>B. subtilis</i>               | Phosphopantetheinyl transferase | None                    | P39135                  | 16         |
| CAR <sub>his</sub>     | <i>M. marinum</i>                | Carboxylic acid reductase       | N-terminal 6x his tag   | B2HN69                  | This study |
| slr1192                | <i>Synechocystis</i> sp PCC 6803 | Aldehyde reductase              | None                    | P74721                  | 17         |
| slr1192 <sub>his</sub> | <i>Synechocystis</i> sp PCC 6803 | Aldehyde reductase              | N-terminal 6x his tag   | As above                | 17         |
| ADC <sub>his</sub>     | <i>P. marinus</i>                | Aldehyde decarbonylase          | N-terminal 6x his tag   | NP_895059.1             | 2          |
| Ahr                    | <i>E. coli</i>                   | Aldehyde reductase              | None                    | C6EC82                  | This study |
| Ahr <sub>his</sub>     | <i>E. coli</i>                   | Aldehyde reductase              | N-terminal 6x his tag   | As above                | This study |

## References

1. Akhtar MK, Jones PR (2008) Engineering of a synthetic hydF-hydE-hydG-hydA operon for biohydrogen production. *Anal Biochem* 373(1):170-172.
2. Das D, Eser BE, Han J, Sciore A, & Marsh EN (2011) Oxygen-independent decarbonylation of aldehydes by cyanobacterial aldehyde decarbonylase: a new reaction of diiron enzymes. *Angew Chem Int Ed Engl* 50(31):7148-7152.
3. Reed JL, Vo TD, Schilling CH, Palsson BO (2003) An expanded genome-scale model of *Escherichia coli* K-12 (iJR904 GSM/GPR). *Genome Biol* 4(9):R54.
4. Feist AM, *et al.* (2007) A genome-scale metabolic reconstruction for *Escherichia coli* K-12 MG1655 that accounts for 1260 ORFs and thermodynamic information. *Mol Syst Biol* 3:121.
5. Becker SA, *et al.* (2007) Quantitative prediction of cellular metabolism with constraint-based models: the COBRA Toolbox. *Nat Protoc* 2(3):727-738.
6. Flamholz A, Noor E, Bar-Even A, Milo R (2012) eQuilibrator-the biochemical thermodynamics calculator. *Nucleic Acids Res* 40(Database issue):D770-775.
7. Laemmli, UK (1970) Cleavage of structural proteins during assembly of the head of bacteriophage T4. *Nature* 227(5259):680-685.
8. Goujon M, McWilliam H, Li W, Valentin F, Squizzato S, Paern J, Lopez R (2010) A new bioinformatics analysis tools framework at EMBL-EBI. *Nucleic Acids Res* 38 (Web Server issue):W695-9.
9. Steen EJ, Kang Y, Bokinsky G, Hu Z, Schirmer A, McClure A, del Cardayre SB, Keasling JD (2010) Microbial production of fatty-acid-derived fuels and chemicals from plant biomass. *Nature* 463(7280):559-562.
10. Schirmer A, Rude MA, Li X, Popova E, del Cardayre SB (2010) Microbial biosynthesis of alkanes. *Science* 329(5991):559-562.
11. Spencer AK, Greenspan AD, Cronan JE Jr (1978) Thioesterases I and II of *Escherichia coli*. Hydrolysis of native acyl-acyl carrier protein thioesters. *J Biol Chem* 253(17):5922-5926.
12. Kameda K, Nunn WD (1981) Purification and characterization of acyl coenzyme A synthetase from *Escherichia coli*. *J Biol Chem* 256(11):5702-5707.
13. Reiser S, Somerville C (1997) Isolation of mutants of *Acinetobacter calcoaceticus* deficient in wax ester synthesis and complementation of one mutation with a gene encoding a fatty acyl coenzyme A reductase. *J Bacteriol* 179(9):2969-2975.
14. Willis RM, Wahlen BD, Seefeldt LC, Barney BM (2011) Characterization of a fatty acyl-CoA reductase from *Marinobacter aquaeolei* VT8: a bacterial enzyme catalyzing the reduction of fatty acyl-CoA to fatty alcohol. *Biochemistry* 50(48):10550-8.
15. Cho H, Cronan JE Jr (1995) Defective export of a periplasmic enzyme disrupts regulation of fatty acid synthesis. *J Biol Chem* 270(9):4216-4219.
16. Quadri LE, Weinreb PH, Lei M, Nakano MM, Zuber P, Walsh CT (1998) Characterization of Sfp, a *Bacillus subtilis* phosphopantetheinyl transferase for peptidyl carrier protein domains in peptide synthetases. *Biochemistry* 37(6):1585-1595.
17. Vidal R, López-Maury L, Guerrero MG, Florencio FJ (2009) Characterization of an alcohol dehydrogenase from the *Cyanobacterium Synechocystis* sp. strain PCC 6803 that responds to environmental stress conditions via the Hik34-Rre1 two-component system. *J Bacteriol* 191(13):4383-4391.
